# Supplementary material for: Distribution and Molecular Evolution of Bacillus anthracis Genotypes in Namibia
Source: PubMed Central journal article supplement (PMC3295808; doi:10.1371/journal.pntd.0001534), 2012-03-06
Supplement: pntd.0001534.s009.pdf [file pntd.0001534.s009.pdf]

**Table S2: Records on isolates of the ENP used for outbreak analysis**

| Isolate No.      | MLVA-Genotype | Species          | Code       | Origin                             | Comment                                                            |
|------------------|---------------|------------------|------------|------------------------------------|--------------------------------------------------------------------|
| <b>YEAR 1983</b> |               |                  |            |                                    |                                                                    |
| ASC58            | 6             | Elephant         | N8K0Q93B   | Gemsbokvlakte, road to Olifantsbad |                                                                    |
| ASC59            | 6             | Elephant         | N8K0Q93L   | Rhinodrive                         |                                                                    |
| ASC60            | 6             | Elephant         | N8K0Q93V   | Gobaub                             |                                                                    |
| ASC61            | 6             | Burchell's zebra | N8K0Q945   | Gemsbokvlakte                      |                                                                    |
| ASC62            | 6             | Burchell's zebra | N8K0Q94F   | Gemsbokvlakte                      |                                                                    |
| <b>YEAR 1987</b> |               |                  |            |                                    |                                                                    |
| ASC72            | 6             | Burchell's zebra | N8K0Q971   | not known                          |                                                                    |
| ASC73            | 6             | Burchell's zebra | N8K0Q97H   | not known                          |                                                                    |
|                  |               |                  |            |                                    |                                                                    |
| ASC74            | 17            | vulture feces    | N8K0Q97N   | near zebra ASC72                   |                                                                    |
|                  |               |                  |            |                                    |                                                                    |
| ASC75            | 4             | Blue wildebeest  | N8K0Q97Y   | not known                          |                                                                    |
| ASC76            | 4             | Springbok        | N8K0Q98B   | not known                          |                                                                    |
|                  |               |                  |            |                                    |                                                                    |
| ASC77            | 5             | Blue wildebeest  | N8K0Q98L   | not known                          |                                                                    |
| <b>YEAR 1988</b> |               |                  |            |                                    |                                                                    |
| AF73             | 14            | Elephant         | 881013 RV  | 1 km NW Pionier dam                | continuing outbreak                                                |
| AF79             | 14            | Elephant         | 881106 RV  | Duikerdrink                        |                                                                    |
| AF80             | 14            | Elephant         | 881203 LH  | Fisher's Pan                       | possible Elephant movement, but not yet supported by tracking data |
|                  |               |                  |            |                                    |                                                                    |
| AF77             | 29            | Elephant         | 881026 RV  | 1 km E turnoff Starks Mt.          |                                                                    |
|                  |               |                  |            |                                    |                                                                    |
| AF69             | 6             | Hartmann's Zebra | 880325 DJG | Starks Mt.                         | probably continuing or recurrent outbreak(s)                       |
| AF70             | 6             | Hartmann's Zebra | 880521 AdT | Rateldraf turnoff                  |                                                                    |
| AF68             | 6             | Blue wildebeest  | 880530 ML  | 14 km N Okondeka                   |                                                                    |
| AF71             | 6             | Elephant         | 880911 RV  | 400 m S Rateldraf turnoff          |                                                                    |

|                  |    |                     |               |                           |                                                                                   |
|------------------|----|---------------------|---------------|---------------------------|-----------------------------------------------------------------------------------|
| AF78             | 6  | Elephant            | 881018 RV     | Dolmietpunt gravel pit    |                                                                                   |
| AF74             | 6  | Elephant            | 881020 DJG    | Dolomietpunt              |                                                                                   |
| AF75             | 6  | Elephant            | 881026 RV     | 1 km E turnoff Starks Mt  |                                                                                   |
| AF76             | 6  | Elephant            | 881029 WH     | Chudop                    | possible<br>Elephant<br>movement,<br>but not yet<br>supported by<br>tracking data |
| <b>YEAR 1989</b> |    |                     |               |                           |                                                                                   |
| AF81             | 14 | Elephant            | 890918 ML     | Okawao                    | probably<br>continuing<br>outbreak                                                |
| AF83             | 14 | Elephant            | 891208 SSS    | 1 km S Tobieroen          |                                                                                   |
| AF86             | 14 | Elephant            | 891204        | Tobieroen                 |                                                                                   |
| AF88             | 14 | Elephant            | 891208 FJ     | Tobieroen                 |                                                                                   |
| AF89             | 14 | Elephant            | 891208 FJ     | Nerens                    |                                                                                   |
| AF91             | 14 | Elephant            | 891208 SSS    | 1 km S of Nerens          |                                                                                   |
| AF92             | 14 | Elephant            | 891208 SSS    | 0.5 km W of Nerens        |                                                                                   |
| AF94             | 14 | Elephant            | 891114 MdP    | no record                 |                                                                                   |
| AF87             | 15 | Elephant            | 891204        | Tobieroen                 |                                                                                   |
| AF93             | 6  | Elephant            | 891114 MdP    | no record                 |                                                                                   |
| <b>YEAR 1991</b> |    |                     |               |                           |                                                                                   |
| AF 96            | 4  | Elephant            | 91.7.11.RD    | 14 km NW Halali           |                                                                                   |
| AF 99            | 4  | Burchell's<br>zebra | 91.9.1.WCG    | Okondeka, 2 km W          |                                                                                   |
| AF 101           | 4  | Blue<br>Wildebeest  | 91.12.30.JLR  | 3 km E of Namutoni        | separate<br>outbreak                                                              |
| AF 95            | 6  | Burchell's<br>zebra | 91.4.25 WCG   | N of Wolfsnes             |                                                                                   |
| AF 98            | 6  | Blue<br>Wildebeest  | 91.9.1.WCG    | 5 km W of<br>Kameeldoring | separate<br>outbreak                                                              |
| <b>YEAR 1992</b> |    |                     |               |                           |                                                                                   |
| AF105            | 6  | Burchell's<br>zebra | 920216-01 JLR | Namutoni, Blankshelm      | probably the<br>same<br>outbreak                                                  |
| AF 106           | 6  | Blue<br>wildebeest  | 920219-01 JLR | Namutoni                  |                                                                                   |
| AF 107           | 6  | Blue<br>wildebeest  | 920325-01 JLR | Namutoni airstrip         |                                                                                   |
| AF 116           | 6  | Elephant            | 920419-01 JLR | 4 km N of Mushara         | possible<br>Elephant<br>movement                                                  |
| AF 121           | 6  | Blue<br>wildebeest  | 920929-01 JLR | Chudop                    | continuing or<br>recurrent<br>outbreak                                            |
| AF 124           | 6  | Burchell's<br>zebra | 92106-01 JLR  | 1 km S of Namutoni        |                                                                                   |

|                  |    |                     |                           |                                            |                                              |
|------------------|----|---------------------|---------------------------|--------------------------------------------|----------------------------------------------|
| AF 128           | 6  | Elephant            | 921216-01 WV              | Pan point                                  | possible<br>Elephant<br>movement             |
| AF 108           | 23 | Elephant            | 920313-01 MA              | no record                                  |                                              |
| AF 111           | 23 | Elephant            | 920411-01 WDP             | Gobaub                                     | same<br>outbreak<br>possibly<br>disseminated |
| AF 112           | 23 | Elephant            | 920415-01 RD              | 13 km N of Halali                          |                                              |
| AF 113           | 23 | Elephant            | 920422-02 BF              | 0.5 km S of<br>Gemsbokvlakte               |                                              |
| AF 28            | 9  | Blue wildebees      | 920314-01 JLR             | 2 km W of Twee Palms                       | separate<br>outbreak                         |
| AF 104           | 4  | Elephant            | 920215-01 JLR             | Namutoni sewage farm                       | separate<br>outbreak                         |
| AF 109           | 4  | Blue<br>wildebeest  | 920314-01 JLR             | 2 km W of Twee Palms                       |                                              |
| AF123            | 3  | Blue<br>wildebeest  | 921012-01 JLR             | N edge Fishers pan                         | separate<br>outbreak                         |
| AF 119           | 7  | Blue<br>wildebeest  | 92817-01 JLR              | 2 km NE of Namutoni                        | separate<br>outbreak                         |
| AF 103           | 17 | Blue<br>wildebeest  | 92219-01 JLR              | Namutoni                                   | separate<br>outbreak                         |
| <b>YEAR 1994</b> |    |                     |                           |                                            |                                              |
| AF 133           | 6  | Springbok           | 94.10.05.MA               | Koinachas                                  |                                              |
| AF 134           | 23 | Elephant            | 94.11.24.GM               | Rhino drive                                |                                              |
| <b>YEAR 1995</b> |    |                     |                           |                                            |                                              |
| AF 136           | 6  | Burchell's<br>zebra | 95.07.19.PML              | 3.5 km along W Ombika<br>detour            |                                              |
| AF 137           | 6  | Blue<br>Wildebeest  | 95.09.18.FS               | 1 km E of Gobaub<br>turnoff. Next to road. |                                              |
| AF 130           | 6  | Burchell's<br>zebra | 95.11.2.VM                | W of Halali on loop road<br>15m N of road  |                                              |
| AF 141           | 14 | Burchell's<br>zebra | 95.09.22.FS               | 5 km S of Halali turnoff                   |                                              |
| <b>YEAR 2002</b> |    |                     |                           |                                            |                                              |
| AF 3             | 10 | Lion                | SJ 2815 OVC<br>2815/09/02 | Sonderkop                                  |                                              |
| AF 4             | 19 | Antelope            | SJ 2815 OVC<br>2844/09/02 | Okaukuejo, 12 km N                         |                                              |
| <b>YEAR 2005</b> |    |                     |                           |                                            |                                              |
| AF48             | 22 | Ostrich             | 050630 WV                 | Wolfsnes 2.5 km SW                         |                                              |
| AF 56            | 22 | Blue wildebees      | 050919 BK                 | Andoni Plains                              |                                              |

|                  |    |                  |                        |                                      |                                                                    |
|------------------|----|------------------|------------------------|--------------------------------------|--------------------------------------------------------------------|
| AF 58            | 22 | Blue wildebees   | 050919 BK              | Andoni Plains                        | probably the same outbreak                                         |
| AF 59            | 22 | Blue wildebees   | 050919 BK              | Andoni Plains                        |                                                                    |
| AF 60            | 22 | Blue wildebees   | 050919 BK              | Andoni Plains                        |                                                                    |
| AF 61            | 22 | Blue wildebees   | 050919 BK              | Andoni Plains                        |                                                                    |
| AF 62            | 22 | Blue wildebees   | 050919 BK              | Andoni Plains                        |                                                                    |
| AF 32            | 22 | Elephant         | 051001 WV              | Mushara/Kameeldoring crossing        | possible Elephant movement, but not yet supported by tracking data |
| AF 31            | 22 | Elephant         | 051005-01 IU           | Goas                                 |                                                                    |
| AF33             | 22 | Springbok        | 051101 WV              | Okaukuejo Airfield 5.5 km N          | continuing or recurrent outbreak                                   |
| AF44             | 22 | Gemsbok          | 051105-02 WK           | Okondeka N                           |                                                                    |
| AF36             | 22 | Springbok        | 51106                  | Nebrownii                            |                                                                    |
|                  |    |                  |                        |                                      |                                                                    |
| AF17             | 32 | Bovine           | 9999 WVC<br>0517.02.05 | Springbokvlakte                      | separate outbreak                                                  |
|                  |    |                  |                        |                                      |                                                                    |
| AF52             | 6  | Springbok        | 051206 WV              | Okondeka, 0.8 km S                   | separate outbreak                                                  |
|                  |    |                  |                        |                                      |                                                                    |
| AF154            | 9  | Burchell's zebra | 051122-01 BK           | Okondeka 2.64km W                    | separate outbreak                                                  |
|                  |    |                  |                        |                                      |                                                                    |
| AF43             | 18 | Gemsbok          | 051013-01              | Okaukuejo 12 km N                    | probably the same outbreak                                         |
| AF34             | 18 | Springbok        | 051104 WK              | Okondeka N                           |                                                                    |
| AF 65            | 18 | Burchell's zebra | 051104 WT              | Okondeka 2 km W                      |                                                                    |
| AF 64            | 18 | Burchell's zebra | 051104 WV              | Leeubron                             |                                                                    |
|                  |    |                  |                        |                                      |                                                                    |
| AF30             | 19 | Elephant         | 050930-01 BK           | Aus 2.5 km NW towards Odongab        | separate outbreak                                                  |
|                  |    |                  |                        |                                      |                                                                    |
| AF46             | 21 | Burchell's zebra | 051107 WV              | Okaukuejo Airfield 8. km N           | separate outbreak                                                  |
|                  |    |                  |                        |                                      |                                                                    |
| <b>YEAR 2006</b> |    |                  |                        |                                      |                                                                    |
| AF 173           | 6  | Burchell's zebra | 060220 WT              | Leeubron-Adamax Two-Track-Road       | probably the same outbreak                                         |
| AF 153           | 6  | Burchell's zebra | 060220 WT-01           | Gravel pit W of Leeubron             |                                                                    |
| AF 198           | 6  | Burchell's zebra | 060308 WT              | Adamax gravel pit 1.93 km S          |                                                                    |
| AF 164           | 6  | Burchell's zebra | 060314-03 BK           | Natco 5.18 km NE on two-track road   |                                                                    |
| AF 166           | 6  | Springbok        | 060315-01 BK           | Leeubron 5.29 km N on two-track road |                                                                    |
| AF 160           | 6  | Burchell's zebra | 060318-02 WV           | Okondeka 4.55 km W                   |                                                                    |
| AF 163           | 6  | Burchell's zebra | 060318-01 WV           | Okondeka 4.65 km W                   |                                                                    |
|                  |    |                  |                        |                                      |                                                                    |

|                  |    |                  |                     |                                                     |                                              |
|------------------|----|------------------|---------------------|-----------------------------------------------------|----------------------------------------------|
| AF 165           | 6  | Springbok        | 060320 WT           | Leeubron, 5.22 km NW on 2-spoor track               | outbreak, continuing                         |
| AF 158           | 6  | Burchell's zebra | 060328-01 or 03 WT  | Leeubron 3.96 km NW of Adamax Gravel pit, 1,89 km W |                                              |
| AF 174           | 6  | Burchell's zebra | 060328-02 WT        | Leeubron, 3.74 km NW                                |                                              |
| AF 169           | 6  | Springbok        | 060330 WT           | Adamax 4.67km SE                                    |                                              |
| AF 170           | 6  | Burchell's zebra | 060331-01 WT        | Adamax gravel pit 2.17 km NW                        |                                              |
| AF 159           | 6  | Burchell's zebra | 060406-01 or 03 WT  | Leeubron 2.55 km SE of Airstrip 0,74 km W           |                                              |
| AF 162           | 6  | Burchell's zebra | 060412-01 WV        | Namutoni 6.7 km W                                   | probably separate outbreak                   |
| AF 157           | 6  | Burchell's zebra | 060413-01 JK        | Natco - Adamax                                      | continuing from before                       |
| AF 156           | 6  | Burchell's zebra | 060512-02 or -03 WV | Okondeka 8.52 km W of Adamax gravel pit, 1,25 km S  |                                              |
| AF 155           | 6  | Springbok        | 060603 WT           | Dolomietpunt                                        | probably separate outbreak                   |
| AF 188           | 6  | Burchell's zebra | 061011 WK-01        | Gemsbokvlakte 2 km NW                               | recurrent outbreak or continuing from before |
| AF 189           | 6  | Springbok        | 061016 GS-01        | Okaukuejo airstrip, 2.5 km N                        |                                              |
| AF 194           | 6  | Burchell's zebra | 061017 WT           | Okaukuejo Airstrip 2.71 km W                        |                                              |
| AF 161           | 9  | Burchell's zebra | 060309 WT           | Adamax gravel pit, 0.5 km SE                        | probably the same outbreak                   |
| AF172            | 9  | Burchell's zebra | 060406-01 or 03 WT  | Leeubron 2.55 km SE or Airstrip 0,74 km W           |                                              |
| AF 191           | 9  | Springbok        | 060929-01 WK        | Okaukuejo 3KM E                                     | continuing or recurrent                      |
| AF 197           | 9  | Blue wildebees   | 061008 WV           | Okaukuejo                                           |                                              |
| AF 168           | 14 | Burchell's zebra | 060331-02 WT        | Adamax gravel pit 3.12 km NW                        | separate outbreak                            |
| AF 52            | 22 | Blue wildebees   | 060313 WV           | Okaukuejo 8 km towards Leeubron                     | separate outbreak                            |
| AF 171           | 4  | Burchell's zebra | 060330 WT           | Leeubron 5.34 km W                                  | separate outbreak                            |
| AF 192           | 4  | Burchell's zebra | 061130-01 SK        | Pan road                                            |                                              |
| <b>YEAR 2007</b> |    |                  |                     |                                                     |                                              |
| AF 185           | 6  | Springbok        | 070220 WT           | Okaukuejo E                                         | probably the same                            |
| AF 186           | 6  | Elephant         | 070503 WT           | Charls Marais dam                                   |                                              |
| AF 181           | 6  | Burchell's zebra | 070516 SK           | Leeubron detour                                     |                                              |
| AF 177           | 6  | Burchell's zebra | 070606 WV           | Eindpaal 400 m N of trough                          |                                              |
| AF 176           | 6  | Blue wildebees   | 070607 WV           | Leeubron 1.72 km S                                  |                                              |

|                  |   |                  |              |                                                     |                                                 |
|------------------|---|------------------|--------------|-----------------------------------------------------|-------------------------------------------------|
| AF 193           | 6 | Blue wildebees   | 070819 WV    | Okondeka 700 m N                                    | outbreak,<br>continuing                         |
| AF 196           | 6 | Black rhinocero  | 70820        | Pan Point                                           |                                                 |
| AF 150           | 6 | Springbok        | 070919-01 WV | Okaukuejo 9.4 km<br>towards Leeubron                |                                                 |
| AF 183           | 6 | Burchell's zebra | 070925 WV    | Adamax gravel pit 1.8<br>km SE                      |                                                 |
| AF 205           | 6 | Burchell's zebra | 071010-01 WV | Duineveld 4.8 km E                                  | probably<br>separate<br>outbreak                |
| <b>YEAR 2008</b> |   |                  |              |                                                     |                                                 |
| AF 206           | 2 | Burchell's zebra | 071113-01 WV | Okaukuejo air field<br>500m S                       |                                                 |
| AF 199           | 6 | Springbok        | 080310-01 OS | Leeubron N                                          | probably the<br>same<br>outbreak,<br>continuing |
| AF 210           | 6 | Burchell's zebra | 080328-01 HG | Leeubron/Adamax two-<br>track                       |                                                 |
| AF 211           | 6 | Burchell's zebra | 080330-01 OS | Natco/Adamax road                                   |                                                 |
| AF 212           | 6 | Burchell's zebra | 080403-01 LP | Natco intersection                                  |                                                 |
| AF 217           | 6 | Burchell's zebra | 080415-01 OS | Leeubos N                                           |                                                 |
| AF 218           | 6 | Burchell's zebra | 080415-02 OS | Leeubron detour 50 m<br>W                           |                                                 |
| AF 219           | 6 | Burchell's zebra | 080417-01 NB | Gaseb 1 km S towards<br>Ombika                      |                                                 |
| AF 200           | 6 | Springbok        | 080425-01 WV | Leeubron S                                          |                                                 |
| AF 202           | 6 | Blue wildebees   | 080429-01 WV | Air Field Namutoni 6.21<br>km W                     | separate<br>outbreak                            |
| AF 203           | 6 | Blue wildebees   | 080507-01 MK | Okaukuejo 3 km S                                    | continuing<br>from before                       |
| AF 201           | 6 | Springbok        | 080508-01MK  | Gemsbokvlakte                                       |                                                 |
| AF 251           | 6 | Elephant         | 080624-01TD  | Nao-Obes, 1 km N, S of<br>Halali                    | possible<br>Elephant<br>movement                |
| AF 223           | 6 | Springbok        | 080707-01 GS | Leeubos area, rd.<br>between Leeubron &<br>Okondeka | recurrent or<br>continuing<br>from before       |
| AF 247           | 6 | Elephant         | 080924-01 GS | Aroe NE                                             | recurrent or<br>continuing<br>from before       |
| AF 249           | 6 | Elephant         | 081015 MK    | Okaukuejo 500 m S                                   | recurrent or<br>continuing                      |
| AF 230           | 6 | Springbok        | 081018-01 GS | Okaukuejo 1 km E                                    |                                                 |
| AF 248           | 6 | Elephant         | 081021-01 GS | Outside ENP at spring<br>at Okashana centre         | possible<br>Elephant<br>movement<br>out of ENP  |
| AF 222           | 6 | Springbok        | 81023        | King Nehale Gate along<br>fence outside ENP         | continuing<br>from before                       |
| AF 225           | 6 | Springbok        | 081106-01 NB | Nebrowni 0.8 km W                                   | continuing<br>from before                       |

|           |   |                  |              |                                                     |                                       |
|-----------|---|------------------|--------------|-----------------------------------------------------|---------------------------------------|
| AF 235    | 6 | Burchell's zebra | 081106 GS    | Halali, few km W                                    | probably separate outbreak            |
| AF 231    | 6 | Blue wildebees   | 081117 WV    | Twee Palms                                          | recurrent or continuing from before   |
| AF 253    | 6 | Springbok        | 081125-01 PA | Gemsbokvlakte E on plains                           | continuing from before                |
| AF 233    | 6 | Burchell's zebra | 081128 MK    | Nebrowni 1 km E                                     |                                       |
| AF 226    | 6 | Burchell's zebra | 081210 HS    | Natco area                                          |                                       |
| AF 204    | 6 | Vulture          | E 094 WBV    | ENP unknown                                         |                                       |
| YEAR 2009 |   |                  |              |                                                     |                                       |
| AF 213    | 9 | Burchell's zebra | 080405-01 PK | Wolfsnes 2 km SW                                    | probably the same outbreak            |
| AF 214    | 9 | Burchell's zebra | 080407-01 MK | Natco/Sprokieswoud junction S                       |                                       |
| AF 215    | 9 | Burchell's zebra | 080410-01 PK | Wolfsnes 5 km SE                                    |                                       |
| AF 216    | 9 | Burchell's zebra | 080411-01 WT | Okaukuejo air field 6.5 km N                        |                                       |
| AF 220    | 9 | Burchell's zebra | 080508-01 OS | Gemsbokvlakte W                                     |                                       |
| AF 250    | 9 | Elephant         | 080804-01 GS | Eindpaal                                            | recurrent or continuing               |
| AF 228    | 9 | Blue wildebees   | 080910 MK    | Okaukuejo airstrip N                                |                                       |
| AF 221    | 9 | Elephant         | 081017-01 GS | Kwema area outside ENP, 12 km E of King Nehale Gate | possible Elephant movement out of ENP |
| AF 237    | 9 | Springbok        | 081114 WV    | Okaukuejo W towards shooting range                  | recurrent or continuing from before   |
| AF 227    | 9 | Burchell's zebra | 081119-01 DS | Okaukuejo 3 km towards Gemsbokvlakte                |                                       |
| AF 232    | 9 | Burchell's zebra | 081210 HS    | Natco areaA                                         |                                       |
| YEAR 2009 |   |                  |              |                                                     |                                       |
| AF 207    | 4 | Burchell's zebra | 080305-01 OS | Leeubron area                                       | Probably the same outbreak            |
| AF 208    | 4 | Burchell's zebra | 080324-01 OS | Leeubron N                                          |                                       |
| AF 209    | 4 | Burchell's zebra | 080327-01 HG | Leeubron 1.39 km SW                                 |                                       |
| AF 229    | 4 | Springbok        | 081018 MK    | Okaukuejo-Leeubron                                  | recurrent or continuing               |
| AF 224    | 4 | Gemsbok          | 081201 WV    | Okondeka                                            |                                       |
| YEAR 2009 |   |                  |              |                                                     |                                       |
| AF 234    | 6 | Burchell's zebra | 090103-02 BK | Okaukuejo 1 km N 400 m E of road                    |                                       |
| AF 244    | 6 | Springbok        | 090120 WV    | 3.94 km S of Leeubron to 200m E of road             |                                       |
| AF 238    | 6 | Springbok        | 090212 WV+RZ | 3.47 km NW of Adamax on old Okahakane track         |                                       |
| AF 243    | 6 | Burchell's zebra | 090212 WV+RZ | 2.5 km NW of Adamax on a 2 track rd ot Okahakane    |                                       |
| AF 257    | 6 | Burchell's zebra | 090225 RZ    | Wolfsnes                                            |                                       |



|        |   |                  |              |                                                |                                        |
|--------|---|------------------|--------------|------------------------------------------------|----------------------------------------|
| AF 258 | 6 | Burchell's zebra | 090301-01 ZH | 10km S of Leeubron on main road from Okaukuejo | probably the same outbreak, continuing |
| AF 259 | 6 | Springbok        | 090302-01 ZH | Leeubron                                       |                                        |
| AF 260 | 6 | Burchell's zebra | 090303-02 MK | NW of Okaukuejo, road to Leeubron              |                                        |
| AF 261 | 6 | Springbok        | 090307-01 SB | Gravel Pit W of road to Leeubron               |                                        |
| AF 262 | 6 | Springbok        | 090308-01 ZH | W of Leeubron                                  |                                        |
| AF 263 | 6 | Burchell's zebra | 090311-01 MK | 890 m NW of Leeubron, 70 m S of road           |                                        |
| AF 264 | 6 | Burchell's zebra | 090312-01 MK | 990 m SW of SA junction, 120 m S of road       |                                        |
| AF 310 | 6 | Burchell's zebra | 090318-01 SB | SW of Leeubron                                 |                                        |
| AF 265 | 6 | Burchell's zebra | 090324-01 ZH | W of Leeubron                                  |                                        |
| AF 311 | 6 | Springbok        | 090326-01 MK | 5.14 km NW of Okaukuejo                        |                                        |
| AF 267 | 6 | Burchell's zebra | 090401-01 MK | E of Sprokieswoud                              |                                        |
| AF 270 | 6 | Burchell's zebra | 090406-01 MK | ~5 km NW of Okaukuejo; ~10.5 km SE of Leeubron |                                        |
| AF 272 | 6 | Burchell's zebra | 090407-01 ZH | Sprokieswoud-Adamax junction                   |                                        |
| AF 274 | 6 | Burchell's zebra | 090408-01 ZH | SA junction                                    |                                        |
| AF 278 | 6 | Burchell's zebra | 090410-01 MK | ~200 m N of E-W runway Okaukuejo airfield      |                                        |
| AF 279 | 6 | Burchell's zebra | 090410-02 MK | Airfield                                       |                                        |
| AF 280 | 6 | Burchell's zebra | 090411-01 SB | NW of SA (Sprokieswoud-Adamax) junction        |                                        |
| AF 288 | 6 | Burchell's zebra | 090417-01 MK | Betsy's corner, road to Leeubron               |                                        |
| AF 289 | 6 | Burchell's zebra | 090419 ZH    | E of Leeubron                                  |                                        |
| AF 294 | 6 | Burchell's zebra | 090423-01 MK | 10 km NW of Okaukuejo on road to Leeubron      |                                        |
| AF 292 | 6 | Springbok        | 090424-01 MK | 4 km N of Okaukuejo                            |                                        |
| AF 296 | 6 | Springbok        | 090427-01 MK | 3 km N of SA junction                          |                                        |
| AF 300 | 6 | Burchell's zebra | 090514-01 ZH | eastern bend in W drive                        |                                        |
| AF 303 | 6 | Burchell's zebra | 090526-01 ZH | ~8 km S of Leeubron by trees in bend           |                                        |
| AF 305 | 6 | Burchell's zebra | 090606-01 MT | ~5 km NW of Okaukuejo                          |                                        |
| AF 308 | 6 | Burchell's zebra | 090623-01 SB | W of SA junction                               |                                        |
| AF 336 | 6 | Springbok        | 090703-01 SB | 2k W of Leeubron                               |                                        |
| AF 320 | 6 | Burchell's zebra | 090707-01 SB | ~300m S of gravel pit on way to Leeubron       |                                        |



|        |   |                  |              |                                                        |                            |              |
|--------|---|------------------|--------------|--------------------------------------------------------|----------------------------|--------------|
| AF 334 | 6 | Elephant         | 090716-01 MK | 2.5km W of Aus                                         |                            |              |
| AF 327 | 6 | Burchell's zebra | 090825-01 ZH | ~2 km NE of Okaukuejo, Rd to Gembokvlakte              |                            |              |
| AF 323 | 6 | Burchell's zebra | 090914-01 PK | just W of Gembokvlakte, near junction N to main rd     |                            |              |
| AF 322 | 6 | Burchell's zebra | 090921-01 MK | ~5 km SE of Leeubron                                   |                            |              |
| AF 321 | 6 | Burchell's zebra | 090929-01 MK | 2.1 km S of Leeubron, SW of detour Rd                  |                            |              |
| AF 330 | 6 | Burchell's zebra | 090929-01 WV | hill to NW of airfields                                |                            |              |
| AF 329 | 6 | Burchell's zebra | 091001-01 HG | 1.79 NNE of Okaukuejo                                  |                            |              |
| AF 335 | 6 | Burchell's zebra | 091115-01 MK | just S of Okaukuejo waterhole                          |                            |              |
| AF 318 | 6 | Burchell's zebra | 091118-01 MK | 4.6 km E of Sprokieswoud                               |                            |              |
| AF 319 | 6 | Burchell's zebra | 091119-01 ZH | ~ 2 km W of Leeubron                                   |                            |              |
| AF 316 | 6 | Burchell's zebra | 091120-01 ZH | turn-off to gravel pit S of Leeubron                   |                            |              |
| AF 353 | 6 | Springbok        | 091201-01 MK | 750 m NEN of Okaukuejo, rd to gravel pit by big Acacia |                            |              |
| AF 354 | 6 | Burchell's zebra | 091203-01 MK | ~3 km E of Kapupuhedi, 600m S of Road                  |                            |              |
| AF 252 | 6 | Vulture          | wingtag E025 | Twin Trees, N of Okaukuejo                             |                            |              |
| AF 236 | 4 | Burchell's zebra | 090103-01 BK | Okaukuejo airfield SE end of SE/NW strip               |                            |              |
| AF 245 | 4 | Springbok        | 090121-01 MK | ~100 m W of junction two track to Grunewald            |                            |              |
| AF 266 | 4 | Burchell's zebra | 090327-01-MK | NW of Natco                                            |                            |              |
| AF 287 | 4 | Burchell's zebra | 090404-01TK  | Fisher's pan, Namutoni                                 | probably separate outbreak |              |
| AF 268 | 4 | Burchell's zebra | 090405-01 MK | Grootvlakte, S Woud, ~150 m SW of horse camp           |                            |              |
| AF 269 | 4 | Burchell's zebra | 090405-02 MK | Gravel pit N of Grunewald                              |                            |              |
| AF 273 | 4 | Burchell's zebra | 090407-02 ZH | Sprokieswoud-Adamax junction                           |                            |              |
| AF 275 | 4 | Burchell's zebra | 090408-02 ZH | gravel pit by Adamax                                   |                            |              |
| AF 276 | 4 | Burchell's zebra | 090409-02 SB | West of Leeubron                                       |                            |              |
| AF 277 | 4 | Burchell's zebra | 090409-03 ZH | Okondeka-Adamax gravel pit                             |                            |              |
| AF 281 | 4 | Burchell's zebra | 090411-01 ZH | SW of SA junction                                      |                            |              |
| AF 282 | 4 | Burchell's zebra | 090411-02 MK | SE of Grootvlakte horse camp                           |                            |              |
|        |   |                  |              |                                                        |                            | probably the |

|        |   |                  |              |                                                                       |                                        |
|--------|---|------------------|--------------|-----------------------------------------------------------------------|----------------------------------------|
| AF 283 | 4 | Burchell's zebra | 090414-01 MK | 9 km N of Okaukuejo                                                   | same outbreak, continuing              |
| AF 284 | 4 | Burchell's zebra | 090415-01 ZH | 4 km NW of Okaukuejo                                                  |                                        |
| AF 285 | 4 | Burchell's zebra | 090416-01 ZH | Adamax-triangle, western 2 tracks                                     |                                        |
| AF 290 | 4 | Burchell's zebra | 090421-01 SB | N side of western 2 track                                             |                                        |
| AF 295 | 4 | Springbok        | 090424-01 SB | W of SA junction, N side of road                                      |                                        |
| AF 301 | 4 | Springbok        | 090522-01 MK | 2.39 km NE of Okaukuejo, S of west-east runway airfield               |                                        |
| AF 307 | 4 | Burchell's zebra | 090616-01 JK | Nomab parking area in a road                                          |                                        |
| AF 328 | 4 | Elephant         | 090716-01 MK | Gemsbokvlakte waterhole, 5 m E of trough                              |                                        |
|        |   |                  |              |                                                                       |                                        |
| AF 241 | 9 | Springbok        | 090119-01 MK | Main road to Leeubron, near springbok stuck in a tree in October 2008 | probably the same outbreak, continuing |
| AF 246 | 9 | Springbok        | 090121-02 MK | NW of Okaukuejo                                                       |                                        |
| AF 242 | 9 | Blue wildebeest  | 090123-01 ZH | 4.3 km W of Leeubron, ~70 m S of road                                 |                                        |
| AF 291 | 9 | Burchell's zebra | 090422-01 MK | 700 m S of Gemsbokvlakte at 10 m from road                            | recurrent or continuing outbreak       |
| AF 297 | 9 | Burchell's zebra | 090504-01 MK | ~370 NW of Ombika waterhole (western detour)                          |                                        |
| AF 299 | 9 | Blue wildebeest  | 090507-01 MK | 2.51 km NW of Okaukuejo                                               |                                        |
| AF 326 | 9 | Burchell's zebra | 090716-01 MK | ~3 km NW of Okaukuejo                                                 |                                        |
| AF 333 | 9 | Burchell's zebra | 090901-01 ZH | ~1-2 km S of Okaukuejo, rd to Ombika                                  |                                        |
| AF 332 | 9 | Burchell's zebra | 090914-01 MK | 4.96 km NW of Okaukuejo                                               |                                        |
| AF 317 | 9 | Springbok        | 091119-01 WV | 1.4 km N of Okaukuejo                                                 | recurrent or continuing from before    |
|        |   |                  |              |                                                                       |                                        |
| AF 239 | 5 | Burchell's zebra | 090123 WT    | S of Leeubron                                                         | probably separate outbreak             |
| AF 304 | 5 | Springbok        | 090604-01 RZ | Halali                                                                |                                        |
| AF 254 | 5 | Vulture          | wingtag E025 | Twin Trees, N of Okaukuejo                                            |                                        |
|        |   |                  |              |                                                                       |                                        |
| AF 293 | 8 | Burchell's zebra | 090424-01 MK | 3.5 km NW of Okaukuejo                                                | continuing                             |

|                  |    |                     |              |                                                                                                                       |                      |
|------------------|----|---------------------|--------------|-----------------------------------------------------------------------------------------------------------------------|----------------------|
| AF 302           | 8  | Springbok           | 090522-02 MK | 2.07 NE of Okaukuejo<br>SW of N-runway                                                                                | outbreak             |
| AF 309           | 25 | Springbok           | 090626-01 ZH | W-drive north of<br>Gemsbokvlakte ~ 15<br>km                                                                          | separate<br>outbreak |
| AF 355           | 16 | Burchell's zebra    | 091213-01 BK | 2km E of Okaukuejo,<br>~200 m S of main road                                                                          | separate<br>outbreak |
| AF 298           | 3  | Burchell's zebra    | 090505-01 MK | ~800 m W of<br>Okondeka, road to<br>Adamax                                                                            | separate<br>outbreak |
| <b>YEAR 2010</b> |    |                     |              |                                                                                                                       |                      |
| AF 357           | 4  | Burchell's<br>zebra | 100201-02 SB | 2 km north of twin trees                                                                                              |                      |
| AF 360           | 4  | Burchell's<br>zebra | 100202-01 MK | 3.95 km north-west of<br>Gemsbokvlakte, road<br>between<br>Gemsbokvlakte & main<br>road Halali, 450 m east<br>of road |                      |
| AF 359           | 4  | Burchell's<br>zebra | 100202-02 SB | ~1 km south of<br>Leeuboss                                                                                            |                      |
| AF 361           | 4  | Burchell's<br>zebra | 100202-02 MK | 1.12 km north of<br>Okaukuejo waterhole,<br>150 m east of road to<br>airfield                                         |                      |
| AF 362           | 4  | Burchell's<br>zebra | 100203-08 MK | 5.23 km north-west of<br>Okaukuejo, east of 2-<br>track going south from<br>main road to Leeubron                     |                      |
| AF 363           | 4  | Burchell's<br>zebra | 100203-07 MK | ~3 km north-west of<br>Okaukuejo, north of<br>sewer road                                                              |                      |
| AF 365           | 4  | Burchell's<br>zebra | 100203-04 MK | 2.5 km north-west of<br>Okaukuejo                                                                                     |                      |
| AF 369           | 4  | Burchell's<br>zebra | 100204-03 SB | north of 2-track to<br>Grunewald about 1 km<br>west of main road to<br>Leeubron                                       |                      |
| AF 371           | 4  | Burchell's<br>zebra | 100204-02 SB | 300 m east of main<br>road to Leeubron and<br>6.13 km north-west of<br>Okaukuejo                                      |                      |
| AF 372           | 4  | Burchell's<br>zebra | 100205-01 ZH | east of main road near<br>sewer road                                                                                  |                      |

|        |   |                  |              |                                                                                              |                     |
|--------|---|------------------|--------------|----------------------------------------------------------------------------------------------|---------------------|
| AF 375 | 4 | Burchell's zebra | 100208-02 SB | 2.96 km north-west of Gembokvlakte, 100 m north of main road to Gembokvlakte                 | continuing outbreak |
| AF 383 | 4 | Burchell's zebra | 100219-02 MK | 1st gravel pit (100 m north-west of gravel pit) on way from airfield to Leeubron             |                     |
| AF 386 | 4 | Burchell's zebra | 100219-01 SB | 10.7 km north of airfield turnoff, 55 m east of road                                         |                     |
| AF 382 | 4 | Burchell's zebra | 100219-01 MK | 6.6 km north-west of Okaukuejo, road to Leeubron (after betsy's turn)                        |                     |
| AF 385 | 4 | Burchell's zebra | 100219-02 SB | 1.24 km west of Okondeka 1 m north of road                                                   |                     |
| AF 388 | 4 | Burchell's zebra | 100222-04 SB | 7.56 km south-west of Wolfnes, ~2 km east of Leeubron road & ~km west of Okondeka road       |                     |
| AF 390 | 4 | Blue wildebeest  | 100224-01SB  | ~70 m west of Okondeka road, ~300 m north of airfield turnoff                                |                     |
| AF 392 | 4 | Burchell's zebra | 100224-02 WT | eastern 2-track in triangle, 100 m east of road                                              |                     |
| AF 394 | 4 | Burchell's zebra | 100225-01 SB | ~3 km south of Gaseb on west-drive, ~150 m west of road                                      |                     |
| AF 395 | 4 | Burchell's zebra | 100228-01 MK | 960 m north-east of Etosha Ecological Institute (EEI), ~400 m east of gravel pit             |                     |
| AF 396 | 4 | Burchell's zebra | 100301-01 MK | 2.73 km south-east of Adamax, 20 m off road eastside                                         |                     |
| AF 397 | 4 | Burchell's zebra | 100301-01 SB | 5.5 km west of Okaukuejo                                                                     |                     |
| AF 398 | 4 | Burchell's zebra | 100302-01 SB | ~3 km north of Natco, ~200 m west of road                                                    |                     |
| AF 404 | 4 | Burchell's zebra | 100317-02 SB | Okaukuejo waterhole                                                                          |                     |
| AF 402 | 4 | Burchell's zebra | 100317-01 MK | 4.52 km north-west of Okaukuejo, north of gravel pit across from north end of sewage 2-track |                     |

|        |   |                  |              |                                                                                |  |  |
|--------|---|------------------|--------------|--------------------------------------------------------------------------------|--|--|
| AF 405 | 4 | Burchell's zebra | 100320-01 SB | 5.41 km north of Okaukuejo, between Leeubron & Okondeka roads                  |  |  |
| AF 407 | 4 | Burchell's zebra | 100321-01 SB | 2.9 km north-north-east of Okaukuejo                                           |  |  |
| AF 409 | 4 | Burchell's zebra | 100323-02 MK | 3.2 km north-west of Okaukuejo, road to Leeubron, 285 m east of sewage 2-track |  |  |
| AF 410 | 4 | Burchell's zebra | 100323-01 SB | 4.26 km north-west of Wolfnes, ~740 m north-west of Wolfsnes-Leeubron road     |  |  |
| AF 413 | 4 | Burchell's zebra | 100323-05 SB | 512 m east of road, road to Leeubron, 6.91 km north-west of Okaukuejo          |  |  |
| AF 411 | 4 | Burchell's zebra | 100323-03 SB | 4.8 km north-west of Leeubron, 458 m east of Leeubron 2-track                  |  |  |
| AF 415 | 4 | Burchell's zebra | 100324-01 MK | 2.5 km north of Okaukuejo, 1 km east of road to airfield                       |  |  |
| AF 418 | 4 | Burchell's zebra | 100325-02 MK | 723 m south of Okondeka, 160 m west of road                                    |  |  |
| AF 420 | 4 | Burchell's zebra | 100330-01 SB | 400 m south of Sprokieswoud-Adamax junction                                    |  |  |
| AF 424 | 4 | Burchell's zebra | 100402-01 SB | 1.24 km north of Natco, 180 m east of road                                     |  |  |
| AF 425 | 4 | Burchell's zebra | 100406-02 SB | 7.45 km east of Adamax, 122 m north of road                                    |  |  |
|        |   |                  |              |                                                                                |  |  |
| AF 356 | 6 | Burchell's zebra | 100115-01 MK | 2.67 km east of Leeubron, south of Leeubron-Okondeka road                      |  |  |
| AF 358 | 6 | Springbok        | 100201-02 ZH | where western 2-track meets with Adamax-Okondeka road                          |  |  |
| AF 364 | 6 | Burchell's zebra | 100203-05 MK | ~4 km north-west of Okaukuejo off of sewer road                                |  |  |
| AF 366 | 6 | Burchell's zebra | 100203-03 MK | ~400 m north-east of East-West runway                                          |  |  |
| AF 367 | 6 | Burchell's zebra | 100203-02 MK | 0.75 km north of East-West runway                                              |  |  |

|        |   |                  |              |                                                                                                  |                     |
|--------|---|------------------|--------------|--------------------------------------------------------------------------------------------------|---------------------|
| AF 368 | 6 | Burchell's zebra | 000203-01 MK | 3.33 km north-west of Okaukuejo, ~50 m east of East-West runway                                  | continuing outbreak |
| AF 370 | 6 | Burchell's zebra | 100204-04 SB | north-east of Leeubron on road to Wolfsnes, south side of road                                   |                     |
| AF 373 | 6 | Burchell's zebra | 100205-01 MK | 3.22 km north-east of Okaukuejo, 980 south-east of East-West Runway                              |                     |
| AF 374 | 6 | Springbok        | 100208-01 MK | 600 m north of Airfield, 3.6 km north of Okaukuejo                                               |                     |
| AF 376 | 6 | Springbok        | 100209-01 MK | 2.2 km north of enclosure (eastern 2-track)                                                      |                     |
| AF 377 | 6 | Burchell's zebra | 100209-01 MK | 3.62 km south-east of Leeubron, 600 m west of main road                                          |                     |
| AF 378 | 6 | Blue wildebeest  | 100212-01 SB | 0.76 north-west of Gembokvlakte                                                                  |                     |
| AF 379 | 6 | Burchell's zebra | 100215-01 MK | ~4 km east of Sprokieswoud-Adamax junction                                                       |                     |
| AF 380 | 6 | Burchell's zebra | 100218-01 SB | ~5 km west of Adamax on old track                                                                |                     |
| AF 384 | 6 | Burchell's zebra | 100219-02 WT | 5.6 km north-west of Okaukuejo, ~200 m west of road to Leeubron, south of two track to Grunewald |                     |
| AF 389 | 6 | Burchell's zebra | 100222-01 SB | 880 m east of road, 2.8 km south-west of Wolfsnes                                                |                     |
| AF 393 | 6 | Springbok        | 100223-01 WT | 1 km north of Wolfsnes turnoff on side of road, 0.5 m off road                                   |                     |
| AF 391 | 6 | Burchell's zebra | 100224-01 WT | 370 m west of Leeubron detour, 630 m south of Leeubron-Sprokieswoud-Adamax road                  |                     |
| AF 399 | 6 | Blue wildebeest  | 100301-01 BK | 1 km from Namutoni towards Causeway                                                              |                     |
| AF 400 | 6 | Burchell's zebra | 100307-01 SB | ~300 m south of main road, ~ 1 km east of Gembokvlakte turnoff (1st one)                         |                     |

|        |   |                  |              |                                                                                                                                      |                        |                   |
|--------|---|------------------|--------------|--------------------------------------------------------------------------------------------------------------------------------------|------------------------|-------------------|
| AF 403 | 6 | Burchell's zebra | 100317-01 SB | 5.83 km north-north-west of Okaukuejo, 1.27 km west of road to Okondeka, west of first Acacia on road north                          | continuing from before |                   |
| AF 406 | 6 | Burchell's zebra | 100320-02 SB | 5.04 km north of Okaukuejo, between Leeubron & Okondeka roads                                                                        |                        |                   |
| AF 414 | 6 | Springbok        | 100323-02 SB | 300 m north-west of Leeuboss                                                                                                         |                        |                   |
| AF 412 | 6 | Burchell's zebra | 100323-04 SB | 4.45 km south-west of Leeubron, 1.21 km east of SA junction road                                                                     |                        |                   |
| AF 408 | 6 | Burchell's zebra | 100323-01 MK | 3.2 km north of Okaukuejo, 420 m south of East-West Runway                                                                           |                        |                   |
| AF 417 | 6 | Blue wildebeest  | 100324-01MK  | 4.2 km north-north-east of Okaukuejo, 469 m north-north-east of East-West runway, 796 m south-west of North-South runway (North end) |                        |                   |
| AF 419 | 6 | Burchell's zebra | 100325-03 MK | 890 m south-west of Okondeka, 608 m west of road                                                                                     |                        |                   |
| AF 422 | 6 | Burchell's zebra | 100331-01 SB | 2.4 km west of Leeubron, 750 m north of road                                                                                         |                        |                   |
| AF 421 | 6 | Burchell's zebra | 100331-01 ZH | 81 m east of Eastern-2-track (368 m north of Leeubron-Okondeka road)                                                                 |                        |                   |
| AF 423 | 6 | Springbok        | 100402-01 SB | 5.07 km east of Adamax, 155 m south of road                                                                                          |                        |                   |
| AF 431 | 6 | Springbok        | 100409-01 MK | 2.1 km north of Okaukuejo road to airfield, 300 m east of road                                                                       |                        |                   |
|        |   |                  |              |                                                                                                                                      |                        |                   |
| AF 416 | 8 | Springbok        | 100324-01 MK | 5 km south-west of Leeubron, 560 m west of road                                                                                      |                        | separate outbreak |
|        |   |                  |              |                                                                                                                                      |                        |                   |



|        |    |                  |              |                                                                                          |                   |
|--------|----|------------------|--------------|------------------------------------------------------------------------------------------|-------------------|
| AF 387 | 9  | Springbok        | 100220-01 MK | 6.2 km north-west of Okaukuejo, ~250 m north of Grunewald two track off road to Leeubron | separate outbreak |
| AF 381 | 35 | Burchell's zebra | 100219-01 WT | 3.2 km east-north-east of Leeubron, 520 m south of road Leeubron-Okondeka                | separate outbreak |
| AF 401 | 37 | Burchell's zebra | 100311-02 SB | 2.1 km east of Okaukuejo, ~300 m north of Gemsbokvlakte road                             | separate outbreak |
| AF 434 |    | Burchell's zebra | 100221-02 SB | Okondeka road, about 6.7 km north of airfield turnoff, 20 m west of road                 |                   |
| AF 436 |    | Burchell's zebra | 100221-03 SB | 7.98 km from Okaukuejo, on road to Leeubron, ~30 m west of road                          |                   |
| AF 437 |    | Burchell's zebra | 100301-01 ZH | Sprokieswoud, north side of road across from fenced area                                 |                   |
| AF 435 |    | Burchell's zebra | 100306-01 SB | 5.2 km north-north-east Natco, 195 m west of road                                        |                   |
| AF 438 |    | Burchell's zebra | 100311-01 SB | 1.4 km east of Okaukuejo                                                                 |                   |
| AF 439 |    | Burchell's zebra | 100319-01 ZH | ~4 km south of Leeubron, east side of road                                               |                   |
| AF 442 |    | Burchell's zebra | 100319-02 ZH | Okaukuejo, ~1 km north of twin trees on west side of road                                |                   |
| AF 426 |    | Burchell's zebra | 100408-01 SB | 450 m south of Okaukuejo waterhole, 140 m south of road to water tower                   |                   |
| AF 427 |    | Burchell's zebra | 100408-02 SB | 7.09 km south-south-west of Leeubron                                                     |                   |
| AF 428 |    | Burchell's zebra | 100408-03 SB | 6.53 km south-south-west of Leeubron                                                     |                   |
| AF 429 |    | Burchell's zebra | 100408-04 SB | 8.03 km north-west of Okaukuejo                                                          |                   |

|        |  |                  |              |                                                                                     |
|--------|--|------------------|--------------|-------------------------------------------------------------------------------------|
| AF 432 |  | Burchell's zebra | 100409-03 SB | ~2 km west-south-west of Leeubron, ~100 m south of road to Sprokieswoud-Adamax      |
| AF 430 |  | Burchell's zebra | 100409-01 ZH | open plain between Leeubron & Sprokieswoud-Adamax junction, ~2 km west of Leeubron  |
| AF 443 |  | Burchell's zebra | 100411-01 MK | 2 km south-east of Sprokieswoud-Adamax junction, 360 m south off road               |
| AF 433 |  | Burchell's zebra | 100411-02 MK | track to Adamax gravel pit, gravel pit 3 m west of road (350 m north of gravel pit) |
| AF 444 |  | Burchell's zebra | 100412-01 ZH | 800 m east of Sprokieswoud-Adamax junction                                          |
| AF 445 |  | Burchell's zebra | 100413-01 SB | ~500 m north of road, 3.06 km west of Sprokieswoud-Adamax junction                  |
| AF 446 |  | Blue wildebeest  | 100413-01 BK | ~1 km east of Sprokieswoud, ~ 300 m north of road                                   |
| AF 447 |  | Burchell's zebra | 100413-02 SB | ~100 m north-east of Grunewald gravel pit                                           |
| AF 448 |  | Black rhinoceros | 100413-01 MK | 832 m north-north-east of Homob Toilet camp, in gravel pit                          |
| AF 451 |  | Burchell's zebra | 100414-01 SB | 7 km north of Okaukuejo, ~660 m west of Okondeka road                               |
| AF 452 |  | Burchell's zebra | 100414-02 SB | 6.21 km N of Leeubron, 245m W of Leeubron 2-track                                   |
| AF 450 |  | Blue wildebeest  | 100414-01 SB | 7.88 km south-east of Leeubron, 400 m south of road                                 |
| AF 449 |  | OM               | 100414-01 SB | 5.5 km north-west of Okaukuejo, 1.65 km east of road to Leeubron                    |
| AF 453 |  | Burchell's zebra | 100414-04SB  | 1 km north-east of Sprokieswoud-Adamax junction, ~800 m east of road to Adamax      |
| AF 454 |  | Springbok        | 100415-02 SB | 1.79 km south of Sprokieswoud-Adamax                                                |

|        |  |                  |              |                                                                                       |
|--------|--|------------------|--------------|---------------------------------------------------------------------------------------|
| AF 455 |  | Burchell's zebra | 100415-01 SB | 3.51 km south-west of Leeubron, 1 km south of Sprokieswoud-Adamax, 641 m west of road |
| AF 456 |  | Burchell's zebra | 100415-02 SB | 1.19 km south-west of Sprokieswoud-Adamax, 872 m south of road                        |
| AF 457 |  | Burchell's zebra | 100415-03 SB | 1.92 km south of Sprokieswoud-Adamax, 1.11 km west of road                            |
| AF 459 |  | Burchell's zebra | 100416-02 SB | ~100 m north of Okondeka-Adamax road, ~9 km west of Okondeka                          |
| AF 458 |  | Burchell's zebra | 100416-01 SB | 1 km west of Adamax gravel pit, ~600 m south of Okondeka-Adamax road                  |
| AF 461 |  | Burchell's zebra | 100421-02 SB | 5.02 km south-west of Natco, 1.69 km south-west of road to Sprokieswoud-Adamax        |
| AF 460 |  | Burchell's zebra | 100421-01 SB | 4.46 km north-west of Okaukuejo                                                       |
| AF 463 |  | Burchell's zebra | 100423-02 ZH | north of Okaukuejo, 2 km from twin trees                                              |
| AF 462 |  | Burchell's zebra | 100423-01 ZH | ~2 km south of Wolfsnes, ~80 m north of two Acacia on the road to Okondeka            |
| AF 464 |  | Blue wildebeest  | 100424-01 ZH | north of Okaukuejo, ~2 km from Okaukuejo and about 800 m north of sewage turnoff      |
| AF 465 |  | Burchell's zebra | 100427-01 ZH | 890 m north-west of Okaukuejo, west of road to sewage                                 |
| AF 467 |  | Springbok        | 100428-01 MK | 800 m east of Sprokieswoud, 80 m north of road                                        |
| AF 466 |  | Blue wildebeest  | 100428-01 MK | 5.1 km west of Okondeka, ~210 m north of road to Adamax                               |
| AF 468 |  | Burchell's zebra | 100502-01 WB | 8.2 km north-west of Okaukuejo, road to Okondeka, ~20 m west of road                  |

|        |  |                  |              |                                                                                        |
|--------|--|------------------|--------------|----------------------------------------------------------------------------------------|
| AF 470 |  | Burchell's zebra | 100503-03 MK | 4.6 km south of Okaukuejo, Stark's pan, 130 m east of road                             |
| AF 469 |  | Burchell's zebra | 100503-01 MK | Okaukuejo-Okondeka-Leeubron junction                                                   |
| AF 472 |  | Springbok        | 100506-01    | ~4 km south of Leeubron and 100 m north of the vulture roosting trees                  |
| AF 471 |  | Springbok        | 100509-01 MK | 410 m east of northern end of North-South-Runway                                       |
| AF 473 |  | Burchell's zebra | 100510-01 MK | 4.5 km west-north-west of Okaukuejo, 800 m north of two track to Grunewald             |
| AF 474 |  | Burchell's zebra | 100525-01 CC | north-east of Gemsbokvlakte, 5 km from Gemsbokvlakte close to the end of transect 34   |
| AF 475 |  | Burchell's zebra | 100531-01 MK | 3.1 km south of Gaseb, west drive, east of road                                        |
| AF 476 |  | Burchell's zebra | 100602-01 MK | 15.4 km south-west of Gemsbokvlakte, south-east loop of west drive, 625 m west of road |
| AF 477 |  | Springbok        | 100603-01 MK | 940 m south of Gaseb, 370 m west of West-Drive-Road                                    |
| AF 478 |  | Burchell's zebra | 100603-01 MK | 3.4 km south of Gemsbokvlakte, 550 m west of West-Drive                                |
| AF 479 |  | Burchell's zebra | 100607-02 MK | 750 m south of Gemsbokvlakte, ~300 m east of road                                      |
| AF 480 |  | Burchell's zebra | 100607-03 MK | 1.2 km south of Gemsbokvlakte, West-Drive, ~50 m west of road in Catophractes          |
| AF 481 |  | Burchell's zebra | 100607-04 MK | 400 m south of Gemsbokvlakte, road to W-Drive, east of road 34 m                       |
| AF 506 |  | Elephant         | 100606-01 OA | Aus waterhole                                                                          |
| AF 505 |  | Springbok        | 100628-01 MK | 620 m north-east of Newbrownii, 200 m north of road                                    |

|        |  |                  |               |                                                                            |
|--------|--|------------------|---------------|----------------------------------------------------------------------------|
| AF 483 |  | Burchell's zebra | 100614-01 MK  | Diamond drive, top intersection, 265 m south of main road to Newbrownii    |
| AF 496 |  | Burchell's zebra | 100617-01 MK  | 2.3 km north-west of Gembokvlakte                                          |
| AF 484 |  | Burchell's zebra | 100618-01 SB  | 2 km away from Okaukuejo on road to Gembokvlakte                           |
| AF 485 |  | Burchell's zebra | 100621-01 ZH  | W-Drive, east of Gaseb, ~4 km away                                         |
| AF 486 |  | Burchell's zebra | 100622-01 WV  | Halali plains west                                                         |
| AF 487 |  | Burchell's zebra | 1000625-01 SB | W-Drive ~1 km from Gembokvlakte, 50 m north of road                        |
| AF 488 |  | Burchell's zebra | 100628-01 ZH  | Gembokvlakte 200 m from waterhole                                          |
| AF 489 |  | Burchell's zebra | 100706-01 MK  | 1.7 km north-east of W-Drive gravel pit, 1 km east of W-Drive-Road         |
| AF 490 |  | Burchell's zebra | 100707-01 MK  | 1.6 km south of Gembokvlakte, 700 m east of road                           |
| AF 491 |  | Burchell's zebra | 100707-02 MK  | 1.2 km south of Gembokvlakte, ~80 m west of road, down W-Drive             |
| AF 494 |  | Burchell's zebra | 100707-03 MK  | 990 m north of Gembokvlakte, road to main road, 220 m north of road        |
| AF 492 |  | Springbok        | 100708-01 WV  | 2.8 km south of Gembokvlakte, 180 m east of road                           |
| AF 493 |  | Burchell's zebra | 100714-01 SB  | 3.37 km south of Gonob, 50 m east of track                                 |
| AF 495 |  | Burchell's zebra | 100719-01 MK  | ~2.8 km east of Gaseb turn-off, road to Gembokvlakte, ~400 m north of road |
| AF 497 |  | Springbok        | 100723-01 MK  | 650 m south-east of Okaukuejo, south of location, 230 m east of road       |
| AF 498 |  | Elephant         | 100726-01 ZH  | 700-800 m south of Okaukuejo, west of tar road                             |

|                  |  |                  |              |                                                                                     |
|------------------|--|------------------|--------------|-------------------------------------------------------------------------------------|
| AF 499           |  | Springbok        | 100801-01 RZ | 1.1 km north-north-west of Okaukuejo, ~250 m north-east of gravel pit by big Acacia |
| AF 500           |  | Springbok        | 100811-01 MK | two-track to Grunewald                                                              |
| AF 501           |  | LA               | 100828-01 MK | Okaukuejo waterhole                                                                 |
| AF 502           |  | Burchell's zebra | 100830-02 ZH | ~4 km south-east of Gembokvlakte, W-Drive                                           |
| AF 503           |  | Burchell's zebra | 100906-01 ZH | ~150 m north of Okaukuejo waterhole                                                 |
| AF 504           |  | Elephant         | 100908-01 WK | 700 m along eastern detour to Ombika, southern intersection                         |
| not yet analyzed |  | Burchell's zebra | 100916-01 WV | on powerline corner south of location??? ~700 m                                     |
|                  |  | Burchell's zebra | 100922-01 WV | open plain between Okaukuejo and airfield                                           |
|                  |  | Gemsbok          | 100927-01 MK | 3.16 km south of Okaukuejo, 650 m east of tar road                                  |
|                  |  | Blue wildebeest  | 100929-01 ZH | 10 km south of Leeubron, south of road                                              |
|                  |  | Springbok        | 100930-01 ZH | ~4 km south of Leeubron, west of road                                               |
|                  |  | Elephant         | 100930-01 ZH | 100-150 m north of Duiwelsvuur                                                      |
|                  |  | Elephant         | 100930-02 ZH | 200 m east of Duiwelsvuur waterhole                                                 |
|                  |  | Black rhinoceros | 101012-01 BK | Nerens                                                                              |
|                  |  | Burchell's zebra | 101012-01 MK | 840 m south-south-west of Okaukuejo, south of 2-track                               |
|                  |  | Elephant         | 101012-01 MK | 4.64 km south-east of M'Bari, ~15m south of road                                    |
|                  |  | Giraffe          | 101013-01 MK | ~600 m north of Okondeka waterhole                                                  |
|                  |  | Burchell's zebra | 101019-01 CC | 3.85 km north-east of Gembokvlakte, road to Nebrownii                               |
|                  |  | Burchell's zebra | 101019-01 MK | 4.5 km north-north-east of Okaukuejo, east of East-West runway                      |
|                  |  | Burchell's zebra | 101019-02 MK | 4.3 km north-north-east of Okaukuejo, edge of pan                                   |

|  |                  |              |                                                               |
|--|------------------|--------------|---------------------------------------------------------------|
|  | Burchell's zebra | 101019-04 MK | just east of Gembokvlakte                                     |
|  | Burchell's zebra | 101019-05 MK | ~6 km north of Okaukuejo, road to Okondeka, 50 m west of road |
|  | Burchell's zebra | 101021-01 ZH | just east of Gembokvlakte                                     |
|  | Springbok        | 101025-01 MK | 580 m south-south-west of Gembokvlakte, W-drive               |
|  | Burchell's zebra | 101112-01 ZH | 4.9 km north-east?? of Okaukuejo, Leeubron road               |
|  | Black rhinoceros | 101114-01 CC | 1.5 km south of Gembokvlakte, W-drive                         |



| Isolate No.      | MLVA-Genotype | Species             | Code       | Origin                                   | Comment                                                                                       |
|------------------|---------------|---------------------|------------|------------------------------------------|-----------------------------------------------------------------------------------------------|
| <b>YEAR 1983</b> |               |                     |            |                                          |                                                                                               |
| ASC58            | 6             | Elephant            | N8K0Q93B   | Gemsbokvlakte,<br>road to<br>Olifantsbad |                                                                                               |
| ASC59            | 6             | Elephant            | N8K0Q93L   | Rhinodrive                               |                                                                                               |
| ASC60            | 6             | Elephant            | N8K0Q93V   | Gobaub                                   |                                                                                               |
| ASC61            | 6             | Burchell's<br>zebra | N8K0Q945   | Gemsbokvlakte                            |                                                                                               |
| ASC62            | 6             | Burchell's<br>zebra | N8K0Q94F   | Gemsbokvlakte                            |                                                                                               |
| <b>YEAR 1987</b> |               |                     |            |                                          |                                                                                               |
| ASC72            | 6             | Burchell's<br>zebra | N8K0Q971   | not known                                |                                                                                               |
| ASC73            | 6             | Burchell's<br>zebra | N8K0Q97H   | not known                                |                                                                                               |
|                  |               |                     |            |                                          |                                                                                               |
| ASC74            | 17            | vulture feces       | N8K0Q97N   | near zebra<br>ASC72                      |                                                                                               |
|                  |               |                     |            |                                          |                                                                                               |
| ASC75            | 4             | Blue<br>wildebeest  | N8K0Q97Y   | not known                                |                                                                                               |
| ASC76            | 4             | Springbok           | N8K0Q98B   | not known                                |                                                                                               |
|                  |               |                     |            |                                          |                                                                                               |
| ASC77            | 5             | Blue<br>wildebeest  | N8K0Q98L   | not known                                |                                                                                               |
| <b>YEAR 1988</b> |               |                     |            |                                          |                                                                                               |
| AF73             | 14            | Elephant            | 881013 RV  | 1 km NW Pionier<br>dam                   | continuing<br>outbreak                                                                        |
| AF79             | 14            | Elephant            | 881106 RV  | Duikerdrink                              |                                                                                               |
| AF80             | 14            | Elephant            | 881203 LH  | Fisher's Pan                             | <b>possible<br/>Elephant<br/>movement,<br/>but not yet<br/>supported by<br/>tracking data</b> |
|                  |               |                     |            |                                          |                                                                                               |
| AF77             | 29            | Elephant            | 881026 RV  | 1 km E turnoff<br>Starks Mt.             |                                                                                               |
|                  |               |                     |            |                                          |                                                                                               |
| AF69             | 6             | Hartmann's<br>Zebra | 880325 DJG | Starks Mt.                               | probably<br>continuing or<br>recurrent<br>outbreak(s)                                         |
| AF70             | 6             | Hartmann's<br>Zebra | 880521 AdT | Rateldraf turnoff                        |                                                                                               |
| AF68             | 6             | Blue<br>wildebeest  | 880530 ML  | 14 km N<br>Okondeka                      |                                                                                               |
| AF71             | 6             | Elephant            | 880911 RV  | 400 m S<br>Rateldraf turnoff             |                                                                                               |

|                  |    |                  |               |                          |                                                                    |
|------------------|----|------------------|---------------|--------------------------|--------------------------------------------------------------------|
| AF78             | 6  | Elephant         | 881018 RV     | Dolmietpunt gravel pit   | outbreak(s)                                                        |
| AF74             | 6  | Elephant         | 881020 DJG    | Dolomietpunt             |                                                                    |
| AF75             | 6  | Elephant         | 881026 RV     | 1 km E turnoff Starks Mt |                                                                    |
| AF76             | 6  | Elephant         | 881029 WH     | Chudop                   | possible Elephant movement, but not yet supported by tracking data |
| <b>YEAR 1989</b> |    |                  |               |                          |                                                                    |
| AF81             | 14 | Elephant         | 890918 ML     | Okawao                   | probably continuing outbreak                                       |
| AF83             | 14 | Elephant         | 891208 SSS    | 1 km S Tobieroen         |                                                                    |
| AF86             | 14 | Elephant         | 891204        | Tobieroen                |                                                                    |
| AF88             | 14 | Elephant         | 891208 FJ     | Tobieroen                |                                                                    |
| AF89             | 14 | Elephant         | 891208 FJ     | Nerens                   |                                                                    |
| AF91             | 14 | Elephant         | 891208 SSS    | 1 km S of Nerens         |                                                                    |
| AF92             | 14 | Elephant         | 891208 SSS    | 0.5 km W of Nerens       |                                                                    |
| AF94             | 14 | Elephant         | 891114 MdP    | no record                |                                                                    |
| AF87             | 15 | Elephant         | 891204        | Tobieroen                |                                                                    |
| AF93             | 6  | Elephant         | 891114 MdP    | no record                |                                                                    |
| <b>YEAR 1991</b> |    |                  |               |                          |                                                                    |
| AF 96            | 4  | Elephant         | 91.7.11.RD    | 14 km NW Halali          |                                                                    |
| AF 99            | 4  | Burchell's zebra | 91.9.1.WCG    | Okondeka, 2 km W         |                                                                    |
| AF 101           | 4  | Blue Wildebeest  | 91.12.30.JL R | 3 km E of Namutoni       | separate outbreak                                                  |
| AF 95            | 6  | Burchell's zebra | 91.4.25 WCG   | N of Wolfsnes            |                                                                    |
| AF 98            | 6  | Blue Wildebeest  | 91.9.1.WCG    | 5 km W of Kameeldoring   | separate outbreak                                                  |
| <b>YEAR 1992</b> |    |                  |               |                          |                                                                    |
| AF105            | 6  | Burchell's zebra | 920216-01 JLR | Namutoni, Blankshelm     | probably the same outbreak                                         |
| AF 106           | 6  | Blue wildebeest  | 920219-01 JLR | Namutoni                 |                                                                    |
| AF 107           | 6  | Blue wildebeest  | 920325-01 JLR | Namutoni airstrip        |                                                                    |
| AF 116           | 6  | Elephant         | 920419-01 JLR | 4 km N of Mushara        | possible Elephant movement                                         |
| AF 121           | 6  | Blue wildebeest  | 920929-01 JLR | Chudop                   | continuing or recurrent                                            |

|                  |    |                  |               |                                         |                                                          |
|------------------|----|------------------|---------------|-----------------------------------------|----------------------------------------------------------|
| AF 124           | 6  | Burchell's zebra | 92106-01 JLR  | 1 km S of Namutoni                      | recurrent outbreak                                       |
| AF 128           | 6  | Elephant         | 921216-01 WV  | Pan point                               | possible Elephant movement                               |
| AF 127           | 6  | Kudu             | 921029        | Susuwe                                  | not ENP                                                  |
| AF 108           | 23 | Elephant         | 920313-01 MA  | no record                               |                                                          |
| AF 111           | 23 | Elephant         | 920411-01 WDP | Gobaub                                  | same outbreak possibly disseminated by Elephant movement |
| AF 112           | 23 | Elephant         | 920415-01 RD  | 13 km N of Halali                       |                                                          |
| AF 113           | 23 | Elephant         | 920422-02 BF  | 0.5 km S of Gemsbokvlakte               |                                                          |
| AF 28            | 9  | Blue wildebeest  | 920314-01 JLR | 2 km W of Twee Palms                    | separate outbreak                                        |
| AF 104           | 4  | Elephant         | 920215-01 JLR | Namutoni sewage farm                    | separate outbreak                                        |
| AF 109           | 4  | Blue wildebeest  | 920314-01 JLR | 2 km W of Twee Palms                    |                                                          |
| AF123            | 3  | Blue wildebeest  | 921012-01 JLR | N edge Fishers pan                      | separate outbreak                                        |
| AF 119           | 7  | Blue wildebeest  | 92817-01 JLR  | 2 km NE of Namutoni                     | separate outbreak                                        |
| AF 103           | 17 | Blue wildebeest  | 92219-01 JLR  | Namutoni                                | separate outbreak                                        |
| <b>YEAR 1994</b> |    |                  |               |                                         |                                                          |
| AF 133           | 6  | Springbok        | 94.10.05.MA   | Koinachas                               |                                                          |
| AF 134           | 23 | Elephant         | 94.11.24.GM   | Rhino drive                             |                                                          |
| <b>YEAR 1995</b> |    |                  |               |                                         |                                                          |
| AF 136           | 6  | Burchell's zebra | 95.07.19.PM L | 3.5 km along W Ombika detour            |                                                          |
| AF 137           | 6  | Blue Wildebeest  | 95.09.18.FS   | 1 km E of Gobaub turnoff. Next to road. |                                                          |
| AF 130           | 6  | Burchell's zebra | 95.11.2.VM    | W of Halali on loop road 15m N of road  |                                                          |
| AF 141           | 14 | Burchell's zebra | 95.09.22.FS   | 5 km S of Halali turnoff                |                                                          |
| <b>YEAR 1998</b> |    |                  |               |                                         |                                                          |

|                  |    |                                       |                                        |                                    |             |
|------------------|----|---------------------------------------|----------------------------------------|------------------------------------|-------------|
| AF 1             | 33 | Bov. fed to<br>Cheetah and<br>Leopard | SW 0037<br>WWVC<br>1919/11/98          | Okambara                           | not ENP     |
| <b>YEAR 2000</b> |    |                                       |                                        |                                    |             |
| AF 144           | 6  | Burchell's<br>zebra                   | Site 1<br>17.11.2000                   | Okondeka (13 yr<br>old zebra site) | soil sample |
| <b>YEAR 2002</b> |    |                                       |                                        |                                    |             |
| AF 2             | 30 | Caprine                               | SH 938/02<br>BV<br>1946/07/02          | Winkelshutten /<br>Okahandja       | not ENP     |
| AF 3             | 10 | Lion                                  | SJ 2815<br>OVC<br>2815/09/02           | Sonderkop                          |             |
| AF 4             | 19 | Antelope                              | SJ 2815<br>OVC<br>2844/09/02           | Okaukuejo, 12<br>km N              |             |
| <b>YEAR 2003</b> |    |                                       |                                        |                                    |             |
| AF 5             | 1  | Bovine                                | SH 51-3 BV<br>2411/08/03               | Okamaja/Okaha<br>ndja              | not ENP     |
| AF 14            | 30 | Caprine                               | SN 01/10 BM<br>Mariental<br>3163/10/03 | Hatzium/Marient<br>al              | not ENP     |
| AF 15            | 30 | Caprine                               | SN<br>03/08/2AHG<br>2455/08/03         | Awadoab/Marient<br>tal             | not ENP     |
| <b>YEAR 2004</b> |    |                                       |                                        |                                    |             |
| AF 6             | 1  | Bovine                                | SO 7391<br>OVC<br>0860/03/04           | Middelplaats /<br>Otjiwarongo      | not ENP     |
| AF 7             | 18 | Human skin                            | SO 2855 GE<br>2855/09/04               | Otjiwarongo                        | not ENP     |
| AF 8             | 18 | Cheetah                               | SW 2043<br>OJB<br>2043/04/04           | Bergzicht/Windh<br>oek             | not ENP     |
| AF 9             | 18 | Eland                                 | SX 3335 FM<br>3335/10/04               | Gobabis                            | not ENP     |
| AF 10            | 20 | Oryx                                  | SH 3134 CL<br>3134/09/04               | Natalia/Okahand<br>ja              | not ENP     |
| AF 11            | 22 | Caprine                               | SJ 7430<br>OVC<br>3360/10/04           | Nimmerus/Outjo                     | not ENP     |
| AF 12            | 22 | Oryx                                  | SO 7429<br>OVC<br>3337/10/04           | Sangaree/Outjo                     | not ENP     |
| AF 13            | 28 | Bovine                                | EC 001/04<br>JA<br>0059/01/04          | Marasburg/East<br>Caprivi          | not ENP     |

|                  |    |                  |                                |                                          |                                                                                               |
|------------------|----|------------------|--------------------------------|------------------------------------------|-----------------------------------------------------------------------------------------------|
| AF 16            | 30 | Caprine          | SW 15335<br>WVC<br>3261/10/04  | Boomplaas /<br>Keetmanshop               | not ENP                                                                                       |
| <b>YEAR 2005</b> |    |                  |                                |                                          |                                                                                               |
| AF48             | 22 | Ostrich          | 050630 WV                      | Wolfsnes 2.5 km<br>SW                    |                                                                                               |
| AF 56            | 22 | Blue wildebees   | 050919 BK                      | Andoni Plains                            | probably the<br>same<br>outbreak                                                              |
| AF 58            | 22 | Blue wildebees   | 050919 BK                      | Andoni Plains                            |                                                                                               |
| AF 59            | 22 | Blue wildebees   | 050919 BK                      | Andoni Plains                            |                                                                                               |
| AF 60            | 22 | Blue wildebees   | 050919 BK                      | Andoni Plains                            |                                                                                               |
| AF 61            | 22 | Blue wildebees   | 050919 BK                      | Andoni Plains                            |                                                                                               |
| AF 62            | 22 | Blue wildebees   | 050919 BK                      | Andoni Plains                            |                                                                                               |
| AF 32            | 22 | Elephant         | 051001 WV                      | Mushara/Kameel<br>doring crossing        |                                                                                               |
| AF 31            | 22 | Elephant         | 051005-01<br>IU                | Goas                                     | <b>possible<br/>Elephant<br/>movement,<br/>but not yet<br/>supported by<br/>tracking data</b> |
| AF33             | 22 | Springbok        | 051101 WV                      | Okaukuejo<br>Airfield 5.5 km N           | continuing or<br>recurrent<br>outbreak                                                        |
| AF44             | 22 | Gemsbok          | 051105-02<br>WK                | Okondeka N                               |                                                                                               |
| AF36             | 22 | Springbok        | 51106                          | Nebrownii                                |                                                                                               |
| AF 19            | 22 | Kudu             | 7487<br>1906.06.05             | Sangaree                                 | not ENP                                                                                       |
| AF 20            | 22 | Hartebeest       | 7498 OVC<br>2282.07.05         | Sangaree                                 | not ENP                                                                                       |
| AF25             | 22 | Gemsbok          | 7517 OVC<br>3914.10.05         | Sangaree                                 | not ENP                                                                                       |
| AF51             | 22 | Gemsbok          | N (EPACHA<br>2-7) from<br>2005 | Epacha farm<br>south of Etosha<br>border | not ENP                                                                                       |
| <b>YEAR 2006</b> |    |                  |                                |                                          |                                                                                               |
| AF26             | 26 | Bovine           | 5193 LS<br>51.01.12.05         | Okeekolongo                              | not ENP                                                                                       |
| <b>YEAR 2007</b> |    |                  |                                |                                          |                                                                                               |
| AF18             | 30 | Caprine          | 11.05 YBK<br>0949.04.05        | Ombirusu                                 | not ENP                                                                                       |
| <b>YEAR 2008</b> |    |                  |                                |                                          |                                                                                               |
| AF17             | 32 | Bovine           | 9999 WVC<br>0517.02.05         | Springbokvlakte                          | separate<br>outbreak                                                                          |
| <b>YEAR 2009</b> |    |                  |                                |                                          |                                                                                               |
| AF52             | 6  | Springbok        | 051206 WV                      | Okondeka, 0.8<br>km S                    | separate<br>outbreak                                                                          |
| <b>YEAR 2010</b> |    |                  |                                |                                          |                                                                                               |
| AF154            | 9  | Burchell's zebra | 051122-01<br>BK                | Okondeka<br>2.64km W                     | separate<br>outbreak                                                                          |

|                  |    |                  |                       |                                                              |                                                 |
|------------------|----|------------------|-----------------------|--------------------------------------------------------------|-------------------------------------------------|
| AF182            | 13 | Kudu             | 51219                 | Windport Farm<br>429                                         | not ENP                                         |
| AF43             | 18 | Gemsbok          | 051013-01             | Okaukuejo 12<br>km N                                         | probably the<br>same<br>outbreak                |
| AF34             | 18 | Springbok        | 051104 WK             | Okondeka N                                                   |                                                 |
| AF 65            | 18 | Burchell's zebra | 051104 WT             | Okondeka 2 km<br>W                                           |                                                 |
| AF 64            | 18 | Burchell's zebra | 051104 WV             | Leeubron                                                     |                                                 |
| AF 21            | 18 | Gemsbok          | 2809 UT<br>2995.08.05 | Bergzicht                                                    | not ENP                                         |
| AF 22            | 18 | Gemsbok          | 3169 CL<br>3169.08.05 | Neu-Otjisororindi                                            | not ENP                                         |
| AF 24            | 18 | Hartebeest       | 3896 CL<br>3896.10.05 | Neu-Otjisororindi                                            | not ENP                                         |
| AF 23            | 18 | Equine           | 519 WVC<br>3323.09.05 | Nuwe Orde                                                    | not ENP                                         |
| AF30             | 19 | Elephant         | 050930-01<br>BK       | Aus 2.5 km NW<br>towards<br>Odongab                          | separate<br>outbreak                            |
| AF46             | 21 | Burchell's zebra | 051107 WV             | Okaukuejo<br>Airfield 8. km N                                | separate<br>outbreak                            |
| <b>YEAR 2006</b> |    |                  |                       |                                                              |                                                 |
| AF 173           | 6  | Burchell's zebra | 060220 WT             | Leeubron-<br>Adamax Two-<br>Track-Road                       | probably the<br>same<br>outbreak,<br>continuing |
| AF 153           | 6  | Burchell's zebra | 060220 WT-<br>01      | Gravel pit W of<br>Leeubron                                  |                                                 |
| AF 198           | 6  | Burchell's zebra | 060308 WT             | Adamax gravel<br>pit 1.93 km S                               |                                                 |
| AF 164           | 6  | Burchell's zebra | 060314-03<br>BK       | Natco 5.18 km<br>NE on two-track<br>road                     |                                                 |
| AF 166           | 6  | Springbok        | 060315-01<br>BK       | Leeubron 5.29<br>km N on two-<br>track road                  |                                                 |
| AF 160           | 6  | Burchell's zebra | 060318-02<br>WV       | Okondeka 4.55<br>km W                                        |                                                 |
| AF 163           | 6  | Burchell's zebra | 060318-01<br>WV       | Okondeka 4.65<br>km W                                        |                                                 |
| AF 165           | 6  | Springbok        | 060320 WT             | Leeubron, 5.22<br>km NW on 2-<br>spoor track                 |                                                 |
| AF 158           | 6  | Burchell's zebra | 060328-01<br>or 03 WT | Leeubron 3.96<br>km NW of<br>Adamax Gravel<br>pit, 1,89 km W |                                                 |
| AF 174           | 6  | Burchell's zebra | 060328-02<br>WT       | Leeubron, 3.74<br>km NW                                      |                                                 |

|        |    |                  |                     |                                                    |                                              |
|--------|----|------------------|---------------------|----------------------------------------------------|----------------------------------------------|
| AF 169 | 6  | Springbok        | 060330 WT           | Adamax 4.67km SE                                   |                                              |
| AF 170 | 6  | Burchell's zebra | 060331-01 WT        | Adamax gravel pit 2.17 km NW                       |                                              |
| AF 159 | 6  | Burchell's zebra | 060406-01 or 03 WT  | Leeubron 2.55 km SE of Airstrip 0,74 km W          |                                              |
| AF 162 | 6  | Burchell's zebra | 060412-01 WV        | Namutoni 6.7 km W                                  | probably separate outbreak                   |
| AF 157 | 6  | Burchell's zebra | 060413-01 JK        | Natco - Adamax                                     | continuing from before                       |
| AF 156 | 6  | Burchell's zebra | 060512-02 or -03 WV | Okondeka 8.52 km W of Adamax gravel pit, 1,25 km S |                                              |
| AF 155 | 6  | Springbok        | 060603 WT           | Dolomietpunt                                       | probably separate outbreak                   |
| AF 188 | 6  | Burchell's zebra | 061011 WK-01        | Gemsbokvlakte 2 km NW                              | recurrent outbreak or continuing from before |
| AF 189 | 6  | Springbok        | 061016 GS-01        | Okaukuejo airstrip, 2.5 km N                       |                                              |
| AF 194 | 6  | Burchell's zebra | 061017 WT           | Okaukuejo Airstrip 2.71 km W                       |                                              |
|        |    |                  |                     |                                                    |                                              |
| AF 161 | 9  | Burchell's zebra | 060309 WT           | Adamax gravel pit, 0.5 km SE                       | probably the same outbreak                   |
| AF172  | 9  | Burchell's zebra | 060406-01 or 03 WT  | Leeubron 2.55 km SE or Airstrip 0,74 km W          |                                              |
| AF 190 | 9  | Kudu             | 060602 WK           | mid dam farm                                       | not ENP, outbreaks related to ENP            |
| AF 195 | 9  | Kudu             | 060614 WV           | Epacha farm                                        |                                              |
| AF 184 | 9  | Kudu             | 060618 SG TSK.      | Olifantstrek area                                  |                                              |
| AF 191 | 9  | Springbok        | 060929-01 WK        | Okaukuejo 3KM E                                    | continuing or recurrent outbreak             |
| AF 197 | 9  | Blue wildebees   | 061008 WV           | Okaukuejo                                          |                                              |
|        |    |                  |                     |                                                    |                                              |
| AF 168 | 14 | Burchell's zebra | 060331-02 WT        | Adamax gravel pit 3.12 km NW                       | separate outbreak                            |
|        |    |                  |                     |                                                    |                                              |
| AF 52  | 22 | Blue wildebees   | 060313 WV           | Okaukuejo 8 km towards Leeubron                    | separate outbreak                            |
|        |    |                  |                     |                                                    |                                              |
| AF 27  | 26 | Bovine           | 5195 LS 0001/01/06  | <b>Uutsathima</b>                                  | not ENP                                      |
|        |    |                  |                     |                                                    |                                              |



|                  |    |                  |                 |                                   |                                        |
|------------------|----|------------------|-----------------|-----------------------------------|----------------------------------------|
| AF 171           | 4  | Burchell's zebra | 060330 WT       | Leeubron 5.34 km W                | separate outbreak                      |
| AF 192           | 4  | Burchell's zebra | 061130-01 SK    | Pan road                          |                                        |
| <b>YEAR 2007</b> |    |                  |                 |                                   |                                        |
| AF 185           | 6  | Springbok        | 070220 WT       | Okaukuejo E                       | probably the same outbreak, continuing |
| AF 186           | 6  | Elephant         | 070503 WT       | Charls Marais dam                 |                                        |
| AF 181           | 6  | Burchell's zebra | 070516 SK       | Leeubron detour                   |                                        |
| AF 177           | 6  | Burchell's zebra | 070606 WV       | Eindpaal 400 m N of trough        |                                        |
| AF 176           | 6  | Blue wildebeest  | 070607 WV       | Leeubron 1.72 km S                |                                        |
| AF 193           | 6  | Blue wildebeest  | 070819 WV       | Okondeka 700 m N                  |                                        |
| AF 196           | 6  | Black rhinoceros | 70820           | Pan Point                         |                                        |
| AF 150           | 6  | Springbok        | 070919-01 WV    | Okaukuejo 9.4 km towards Leeubron |                                        |
| AF 183           | 6  | Burchell's zebra | 070925 WV       | Adamax gravel pit 1.8 km SE       | probably separate outbreak             |
| AF 205           | 6  | Burchell's zebra | 071010-01 WV    | Duineveld 4.8 km E                |                                        |
| AF 206           | 2  | Burchell's zebra | 071113-01 WV    | Okaukuejo air field 500m S        |                                        |
| AF 175           | 2  | Gemsbok          | 070803-01       | Windport Farm                     | not ENP                                |
| AF 148           | 24 | Ovine            | SH 031/7 BV     | Okahandja                         | not ENP                                |
| AF 151           | 9  | Gemsbok          | OG070802-01 WV  | Windport Farm                     | not ENP                                |
| AF 187           | 9  | Gemsbok          | SX070802        | unknown origin (Windport Farm?)   |                                        |
| AF 147           | 3  | Gemsbok          | SX2675CVL 07/07 | Gobabis                           | not ENP                                |
| <b>YEAR 2008</b> |    |                  |                 |                                   |                                        |
| AF 199           | 6  | Springbok        | 080310-01 OS    | Leeubron N                        | probably the same outbreak, continuing |
| AF 210           | 6  | Burchell's zebra | 080328-01 HG    | Leeubron/Adamax two-track         |                                        |
| AF 211           | 6  | Burchell's zebra | 080330-01 OS    | Natco/Adamax road                 |                                        |
| AF 212           | 6  | Burchell's zebra | 080403-01 LP    | Natco intersection                |                                        |
| AF 217           | 6  | Burchell's zebra | 080415-01 OS    | Leeubos N                         |                                        |

|        |   |                  |              |                                               |                                       |
|--------|---|------------------|--------------|-----------------------------------------------|---------------------------------------|
| AF 218 | 6 | Burchell's zebra | 080415-02 OS | Leeubron detour 50 m W                        |                                       |
| AF 219 | 6 | Burchell's zebra | 080417-01 NB | Gaseb 1 km S towards Ombika                   |                                       |
| AF 200 | 6 | Springbok        | 080425-01 WV | Leeubron S                                    |                                       |
| AF 202 | 6 | Blue wildebees   | 080429-01 WV | Air Field Namutoni 6.21 km W                  | separate outbreak                     |
| AF 203 | 6 | Blue wildebees   | 080507-01 MK | Okaukuejo 3 km S                              | continuing from before                |
| AF 201 | 6 | Springbok        | 080508-01MK  | Gemsbokvlakte                                 |                                       |
| AF 251 | 6 | Elephant         | 080624-01TD  | Nao-Obes, 1 km N, S of Halali                 | possible Elephant movement            |
| AF 223 | 6 | Springbok        | 080707-01 GS | Leeubos area, rd. between Leeubron & Okondeka | recurrent or continuing from before   |
| AF 247 | 6 | Elephant         | 080924-01 GS | Aroe NE                                       | recurrent or continuing from before   |
| AF 249 | 6 | Elephant         | 081015 MK    | Okaukuejo 500 m S                             | recurrent or continuing from before   |
| AF 230 | 6 | Springbok        | 081018-01 GS | Okaukuejo 1 km E                              |                                       |
| AF 248 | 6 | Elephant         | 081021-01 GS | Outside ENP at spring at Okashana centre      | possible Elephant movement out of ENP |
| AF 222 | 6 | Springbok        | 81023        | King Nehale Gate along fence outside ENP      | continuing from before                |
| AF 225 | 6 | Springbok        | 081106-01 NB | Nebrowni 0.8 km W                             | continuing from before                |
| AF 235 | 6 | Burchell's zebra | 081106 GS    | Halali, few km W                              | probably separate outbreak            |
| AF 231 | 6 | Blue wildebees   | 081117 WV    | Twee Palms                                    | recurrent or continuing from before   |
| AF 253 | 6 | Springbok        | 081125-01 PA | Gemsbokvlakte E on plains                     | continuing from before                |
| AF 233 | 6 | Burchell's zebra | 081128 MK    | Nebrowni 1 km E                               |                                       |
| AF 226 | 6 | Burchell's zebra | 081210 HS    | Natco area                                    |                                       |
| AF 204 | 6 | Vulture          | E 094 WBV    | ENP unknown                                   |                                       |

|                  |   |                  |                 |                                                              |                                                |
|------------------|---|------------------|-----------------|--------------------------------------------------------------|------------------------------------------------|
| AF 213           | 9 | Burchell's zebra | 080405-01<br>PK | Wolfsnes 2 km<br>SW                                          | probably the<br>same<br>outbreak               |
| AF 214           | 9 | Burchell's zebra | 080407-01<br>MK | Natco/Sprokiesw<br>oud junction S                            |                                                |
| AF 215           | 9 | Burchell's zebra | 080410-01<br>PK | Wolfsnes 5 km<br>SE                                          |                                                |
| AF 216           | 9 | Burchell's zebra | 080411-01<br>WT | Okaukuejo air<br>field 6.5 km N                              |                                                |
| AF 220           | 9 | Burchell's zebra | 080508-01<br>OS | Gemsbokvlakte<br>W                                           |                                                |
| AF 250           | 9 | Elephant         | 080804-01<br>GS | Eindpaal                                                     | recurrent or<br>continuing<br>outbreak         |
| AF 228           | 9 | Blue wildebeest  | 080910 MK       | Okakukuejo<br>airstrip N                                     |                                                |
| AF 221           | 9 | Elephant         | 081017-01<br>GS | Kwema area<br>outside ENP, 12<br>km E of King<br>Nehale Gate | possible<br>Elephant<br>movement<br>out of ENP |
| AF 237           | 9 | Springbok        | 081114 WV       | Okaukuejo W<br>towards shooting<br>range                     | recurrent or<br>continuing<br>from before      |
| AF 227           | 9 | Burchell's zebra | 081119-01<br>DS | Okaukuejo 3 km<br>towards<br>Gemsbokvlakte                   |                                                |
| AF 232           | 9 | Burchell's zebra | 081210 HS       | Natco areaA                                                  |                                                |
| <b>YEAR 2009</b> |   |                  |                 |                                                              |                                                |
| AF 207           | 4 | Burchell's zebra | 080305-01<br>OS | Leeubron area                                                | Probably the<br>same<br>outbreak               |
| AF 208           | 4 | Burchell's zebra | 080324-01<br>OS | Leeubron N                                                   |                                                |
| AF 209           | 4 | Burchell's zebra | 080327-01<br>HG | Leeubron 1.39<br>km SW                                       |                                                |
| AF 229           | 4 | Springbok        | 081018 MK       | Okaukuejo-<br>Leeubron                                       | recurrent or<br>continuing<br>from before      |
| AF 224           | 4 | Gemsbok          | 081201 WV       | Okondeka                                                     |                                                |
| AF 234           | 6 | Burchell's zebra | 090103-02<br>BK | Okaukuejo 1 km<br>N 400 m E of<br>road                       |                                                |
| AF 244           | 6 | Springbok        | 090120 WV       | 3.94 km S of<br>Leeubron to<br>200m E of road                |                                                |
| AF 238           | 6 | Springbok        | 090212<br>WV+RZ | 3.47 km NW of<br>Adamax on old<br>Okahakane track            |                                                |
| AF 243           | 6 | Burchell's zebra | 090212<br>WV+RZ | 2.5 km NW of<br>Adamax on a 2<br>track rd ot<br>Okahakane    |                                                |
| AF 257           | 6 | Burchell's zebra | 090225 RZ       | Wolfsnes                                                     |                                                |

|        |   |                  |                 |                                                |                                        |
|--------|---|------------------|-----------------|------------------------------------------------|----------------------------------------|
| AF 258 | 6 | Burchell's zebra | 090301-01<br>ZH | 10km S of Leeubron on main road from Okaukuejo | probably the same outbreak, continuing |
| AF 259 | 6 | Springbok        | 090302-01<br>ZH | Leeubron                                       |                                        |
| AF 260 | 6 | Burchell's zebra | 090303-02<br>MK | NW of Okaukuejo, road to Leeubron              |                                        |
| AF 261 | 6 | Springbok        | 090307-01<br>SB | Gravel Pit W of road to Leeubron               |                                        |
| AF 262 | 6 | Springbok        | 090308-01<br>ZH | W of Leeubron                                  |                                        |
| AF 263 | 6 | Burchell's zebra | 090311-01<br>MK | 890 m NW of Leeubron, 70 m S of road           |                                        |
| AF 264 | 6 | Burchell's zebra | 090312-01<br>MK | 990 m SW of SA junction, 120 m S of road       |                                        |
| AF 310 | 6 | Burchell's zebra | 090318-01<br>SB | SW of Leeubron                                 |                                        |
| AF 265 | 6 | Burchell's zebra | 090324-01<br>ZH | W of Leeubron                                  |                                        |
| AF 311 | 6 | Springbok        | 090326-01<br>MK | 5.14 km NW of Okaukuejo                        |                                        |
| AF 267 | 6 | Burchell's zebra | 090401-01<br>MK | E of Sprokieswoud                              |                                        |
| AF 270 | 6 | Burchell's zebra | 090406-01<br>MK | ~5 km NW of Okaukuejo; ~10.5 km SE of Leeubron |                                        |
| AF 272 | 6 | Burchell's zebra | 090407-01<br>ZH | Sprokieswoud-Adamax junction                   |                                        |
| AF 274 | 6 | Burchell's zebra | 090408-01<br>ZH | SA junction                                    |                                        |
| AF 278 | 6 | Burchell's zebra | 090410-01<br>MK | ~200 m N of E-W runway Okaukuejo airfield      |                                        |
| AF 279 | 6 | Burchell's zebra | 090410-02<br>MK | Airfield                                       |                                        |
| AF 280 | 6 | Burchell's zebra | 090411-01<br>SB | NW of SA (Sprokieswoud-Adamax) junction        |                                        |
| AF 288 | 6 | Burchell's zebra | 090417-01<br>MK | Betsy's corner, road to Leeubron               |                                        |
| AF 289 | 6 | Burchell's zebra | 090419 ZH       | E of Leeubron                                  |                                        |

|        |   |                  |                 |                                                     |
|--------|---|------------------|-----------------|-----------------------------------------------------|
| AF 294 | 6 | Burchell's zebra | 090423-01<br>MK | 10 km NW of Okaukuejo on road to Leeubron           |
| AF 292 | 6 | Springbok        | 090424-01<br>MK | 4 km N of Okaukuejo                                 |
| AF 296 | 6 | Springbok        | 090427-01<br>MK | 3 km N of SA junction                               |
| AF 300 | 6 | Burchell's zebra | 090514-01<br>ZH | eastern bend in W drive                             |
| AF 303 | 6 | Burchell's zebra | 090526-01<br>ZH | ~8 km S of Leeubron by trees in bend                |
| AF 305 | 6 | Burchell's zebra | 090606-01<br>MT | ~5 km NW of Okaukuejo                               |
| AF 308 | 6 | Burchell's zebra | 090623-01<br>SB | W of SA junction                                    |
| AF 336 | 6 | Springbok        | 090703-01<br>SB | 2k W of Leeubron                                    |
| AF 320 | 6 | Burchell's zebra | 090707-01<br>SB | ~300m S of gravel pit on way to Leeubron            |
| AF 334 | 6 | Elephant         | 090716-01<br>MK | 2.5km W of Aus                                      |
| AF 327 | 6 | Burchell's zebra | 090825-01<br>ZH | ~2 km NE of Okaukuejo, Rd to Gemsbokvlakte          |
| AF 323 | 6 | Burchell's zebra | 090914-01<br>PK | just W of Gemsbokvlakte, near junction N to main rd |
| AF 322 | 6 | Burchell's zebra | 090921-01<br>MK | ~5 km SE of Leeubron                                |
| AF 321 | 6 | Burchell's zebra | 090929-01<br>MK | 2.1 km S of Leeubron, SW of detour Rd               |
| AF 330 | 6 | Burchell's zebra | 090929-01<br>WV | hill to NW of airfields                             |
| AF 329 | 6 | Burchell's zebra | 091001-01<br>HG | 1.79 NNE of Okaukuejo                               |
| AF 335 | 6 | Burchell's zebra | 091115-01<br>MK | just S of Okaukuejo waterhole                       |
| AF 318 | 6 | Burchell's zebra | 091118-01<br>MK | 4.6 km E of Sprokieswoud                            |
| AF 319 | 6 | Burchell's zebra | 091119-01<br>ZH | ~ 2 km W of Leeubron                                |
| AF 316 | 6 | Burchell's zebra | 091120-01<br>ZH | turn-off to gravel pit S of Leeubron                |

|        |   |                  |                  |                                                                |                                                 |
|--------|---|------------------|------------------|----------------------------------------------------------------|-------------------------------------------------|
| AF 353 | 6 | Springbok        | 091201-01<br>MK  | 750 m NEN of<br>Okaukuejo, rd to<br>gravelpit by big<br>Acacia |                                                 |
| AF 354 | 6 | Burchell's zebra | 091203-01<br>MK  | ~3 km E of<br>Kapupuhedi,<br>600m S of Road                    |                                                 |
| AF 252 | 6 | Vulture          | wingtag<br>E025  | Twin Trees, N of<br>Okaukuejo                                  |                                                 |
| AF 236 | 4 | Burchell's zebra | 090103-01<br>BK  | Okaukuejo<br>airfield SE end<br>of SE/NW strip                 |                                                 |
| AF 245 | 4 | Springbok        | 090121-01<br>MK  | ~100 m W of<br>junction two<br>track to<br>Grunewald           |                                                 |
| AF 266 | 4 | Burchell's zebra | 090327-01-<br>MK | NW of Natco                                                    |                                                 |
| AF 287 | 4 | Burchell's zebra | 090404-<br>01TK  | Fisher's pan,<br>Namutoni                                      | probably<br>separate<br>outbreak                |
| AF 268 | 4 | Burchell's zebra | 090405-01<br>MK  | Grootvlakte, S<br>Woud, ~150 m<br>SW of horse<br>camp          |                                                 |
| AF 269 | 4 | Burchell's zebra | 090405-02<br>MK  | Gravel pit N of<br>Grunewald                                   |                                                 |
| AF 273 | 4 | Burchell's zebra | 090407-02<br>ZH  | Sprokieswoud-<br>Adamax junction                               |                                                 |
| AF 275 | 4 | Burchell's zebra | 090408-02<br>ZH  | gravel pit by<br>Adamax                                        |                                                 |
| AF 276 | 4 | Burchell's zebra | 090409-02<br>SB  | West of<br>Leeubron                                            |                                                 |
| AF 277 | 4 | Burchell's zebra | 090409-03<br>ZH  | Okondeka-<br>Adamax gravel<br>pit                              |                                                 |
| AF 281 | 4 | Burchell's zebra | 090411-01<br>ZH  | SW of SA<br>junction                                           |                                                 |
| AF 282 | 4 | Burchell's zebra | 090411-02<br>MK  | SE of<br>Grootvlatke<br>horse camp                             | probably the<br>same<br>outbreak,<br>continuing |
| AF 283 | 4 | Burchell's zebra | 090414-01<br>MK  | 9 km N of<br>Okaukuejo                                         |                                                 |
| AF 284 | 4 | Burchell's zebra | 090415-01<br>ZH  | 4 km NW of<br>Okaukuejo                                        |                                                 |
| AF 285 | 4 | Burchell's zebra | 090416-01<br>ZH  | Adamax-triangle,<br>western 2 tracks                           |                                                 |
| AF 290 | 4 | Burchell's zebra | 090421-01<br>SB  | N side of<br>western 2 track                                   |                                                 |

|        |   |                    |                 |                                                                                   |                                                 |
|--------|---|--------------------|-----------------|-----------------------------------------------------------------------------------|-------------------------------------------------|
| AF 295 | 4 | Springbok          | 090424-01<br>SB | W of SA<br>junction, N side<br>of road                                            |                                                 |
| AF 301 | 4 | Springbok          | 090522-01<br>MK | 2.39 km NE of<br>Okaukuejo, S of<br>west - east<br>runway airfield                |                                                 |
| AF 307 | 4 | Burchell's zebra   | 090616-01<br>JK | Nomab parking<br>area in a road                                                   |                                                 |
| AF 328 | 4 | Elephant           | 090716-01<br>MK | Gemsbokvlakte<br>waterhole, 5 m E<br>of trough                                    |                                                 |
| AF 241 | 9 | Springbok          | 090119-01<br>MK | Main road to<br>Leeubron, near<br>springbok stuck<br>in a tree in<br>October 2008 | probably the<br>same<br>outbreak,<br>continuing |
| AF 246 | 9 | Springbok          | 090121-02<br>MK | NW of<br>Okaukuejo                                                                |                                                 |
| AF 242 | 9 | Blue<br>wildebeest | 090123-01<br>ZH | 4.3 km W of<br>Leeubron, ~70 m<br>S of road                                       |                                                 |
| AF 291 | 9 | Burchell's zebra   | 090422-01<br>MK | 700 m S of<br>Gemsbokvlakte<br>at 10 m from<br>road                               | recurrent or<br>continuing<br>outbreak          |
| AF 297 | 9 | Burchell's zebra   | 090504-01<br>MK | ~370 NW of<br>Ombika<br>waterhole<br>(western detour)                             |                                                 |
| AF 299 | 9 | Blue<br>wildebeest | 090507-01<br>MK | 2.51 km NW of<br>Okaukuejo                                                        |                                                 |
| AF 326 | 9 | Burchell's zebra   | 090716-01<br>MK | ~3 km NW of<br>Okaukuejo                                                          |                                                 |
| AF 333 | 9 | Burchell's zebra   | 090901-01<br>ZH | ~1-2 km S of<br>Okaukuejo, rd to<br>Ombika                                        |                                                 |
| AF 332 | 9 | Burchell's zebra   | 090914-01<br>MK | 4.96 km NW of<br>Okaukuejo                                                        |                                                 |
| AF 314 | 9 | Gemsbok            | SW 6318 I<br>JB | Marula Game<br>Ranch;<br>Windhoek                                                 | not ENP                                         |
| AF 317 | 9 | Springbok          | 091119-01<br>WV | 1.4 km N of<br>Okaukuejo                                                          | recurrent or<br>continuing<br>from before       |
| AF 239 | 5 | Burchell's zebra   | 090123 WT       | S of Leeubron                                                                     |                                                 |
| AF 304 | 5 | Springbok          | 090604-01<br>RZ | Halali                                                                            | probably<br>separate<br>outbreak                |

|                  |    |                     |                 |                                                                                                                              |                        |
|------------------|----|---------------------|-----------------|------------------------------------------------------------------------------------------------------------------------------|------------------------|
| AF 254           | 5  | Vulture             | wingtag<br>E025 | Twin Trees, N of<br>Okaukuejo                                                                                                |                        |
| AF 293           | 8  | Burchell's zebra    | 090424-01<br>MK | 3.5 km NW of<br>Okaukuejo                                                                                                    | continuing<br>outbreak |
| AF 302           | 8  | Springbok           | 090522-02<br>MK | 2.07 NE of<br>Okaukuejo SW<br>of N-runway                                                                                    |                        |
| AF 309           | 25 | Springbok           | 090626-01<br>ZH | W-drive north of<br>Gemsbokvlakte<br>~ 15 km                                                                                 | separate<br>outbreak   |
| AF 355           | 16 | Burchell's zebra    | 091213-01<br>BK | 2km E of<br>Okaukuejo, ~200<br>m S of main road                                                                              | separate<br>outbreak   |
| AF 298           | 3  | Burchell's zebra    | 090505-01<br>MK | ~800 m W of<br>Okondeka, road<br>to Adamax                                                                                   | separate<br>outbreak   |
| <b>YEAR 2010</b> |    |                     |                 |                                                                                                                              |                        |
| AF 357           | 4  | Burchell's<br>zebra | 100201-02<br>SB | 2 km north of<br>twin trees                                                                                                  |                        |
| AF 360           | 4  | Burchell's<br>zebra | 100202-01<br>MK | 3.95 km north-<br>west of<br>Gemsbokvlakte,<br>road between<br>Gemsbokvlakte<br>& main road<br>Halali, 450 m<br>east of road |                        |
| AF 359           | 4  | Burchell's<br>zebra | 100202-02<br>SB | ~1 km south of<br>Leeuboss                                                                                                   |                        |
| AF 361           | 4  | Burchell's<br>zebra | 100202-02<br>MK | 1.12 km north of<br>Okaukuejo<br>waterhole, 150<br>m east of road to<br>airfield                                             |                        |
| AF 362           | 4  | Burchell's<br>zebra | 100203-08<br>MK | 5.23 km north-<br>west of<br>Okaukuejo, east<br>of 2-track going<br>south from main<br>road to<br>Leeubron                   |                        |
| AF 363           | 4  | Burchell's<br>zebra | 100203-07<br>MK | ~3 km north-<br>west of<br>Okaukuejo,<br>north of sewer<br>road                                                              |                        |



|        |   |                  |              |                                                                                        |
|--------|---|------------------|--------------|----------------------------------------------------------------------------------------|
| AF 365 | 4 | Burchell's zebra | 100203-04 MK | 2.5 km north-west of Okaukuejo                                                         |
| AF 369 | 4 | Burchell's zebra | 100204-03 SB | north of 2-track to Grunewald about 1 km west of main road to Leeubron                 |
| AF 371 | 4 | Burchell's zebra | 100204-02 SB | 300 m east of main road to Leeubron and 6.13 km north-west of Okaukuejo                |
| AF 372 | 4 | Burchell's zebra | 100205-01 ZH | east of main road near sewer road                                                      |
| AF 375 | 4 | Burchell's zebra | 100208-02 SB | 2.96 km north-west of Gemsbokvlakte, 100 m north of main road to Gemsbokvlakte         |
| AF 383 | 4 | Burchell's zebra | 100219-02 MK | 1st gravel pit (100 m north-west of gravel pit) on way from airfield to Leeubron       |
| AF 386 | 4 | Burchell's zebra | 100219-01 SB | 10.7 km north of airfield turnoff, 55 m east of road                                   |
| AF 382 | 4 | Burchell's zebra | 100219-01 MK | 6.6 km north-west of Okaukuejo, road to Leeubron (after betsy's turn)                  |
| AF 385 | 4 | Burchell's zebra | 100219-02 SB | 1.24 km west of Okondeka 1 m north of road                                             |
| AF 388 | 4 | Burchell's zebra | 100222-04 SB | 7.56 km south-west of Wolfnes, ~2 km east of Leeubron road & ~km west of Okondeka road |

|        |   |                  |              |                                                                                              |                     |
|--------|---|------------------|--------------|----------------------------------------------------------------------------------------------|---------------------|
| AF 390 | 4 | Blue wildebeest  | 100224-01SB  | ~70 m west of Okondeka road, ~300 m north of airfield turnoff                                | continuing outbreak |
| AF 392 | 4 | Burchell's zebra | 100224-02 WT | eastern 2-track in triangle, 100 m east of road                                              |                     |
| AF 394 | 4 | Burchell's zebra | 100225-01 SB | ~3 km south of Gaseb on west-drive, ~150 m west of road                                      |                     |
| AF 395 | 4 | Burchell's zebra | 100228-01 MK | 960 m north-east of Etosha Ecological Institute (EEI), ~400 m east of gravel pit             |                     |
| AF 396 | 4 | Burchell's zebra | 100301-01 MK | 2.73 km south-east of Adamax, 20 m off road eastside                                         |                     |
| AF 397 | 4 | Burchell's zebra | 100301-01 SB | 5.5 km west of Okaukuejo                                                                     |                     |
| AF 398 | 4 | Burchell's zebra | 100302-01 SB | ~3 km north of Natco, ~200 m west of road                                                    |                     |
| AF 404 | 4 | Burchell's zebra | 100317-02 SB | Okaukuejo waterhole                                                                          |                     |
| AF 402 | 4 | Burchell's zebra | 100317-01 MK | 4.52 km north-west of Okaukuejo, north of gravel pit across from north end of sewage 2-track |                     |
| AF 405 | 4 | Burchell's zebra | 100320-01 SB | 5.41 km north of Okaukuejo, between Leeubron & Okondeka roads                                |                     |
| AF 407 | 4 | Burchell's zebra | 100321-01 SB | 2.9 km north-north-east of Okaukuejo                                                         |                     |
| AF 409 | 4 | Burchell's zebra | 100323-02 MK | 3.2 km north-west of Okaukuejo, road to Leeubron, 285 m east of sewage 2-track               |                     |

|        |   |                  |              |                                                                            |  |
|--------|---|------------------|--------------|----------------------------------------------------------------------------|--|
| AF 410 | 4 | Burchell's zebra | 100323-01 SB | 4.26 km north-west of Wolfnes, ~740 m north-west of Wolfsnes Leeubron road |  |
| AF 413 | 4 | Burchell's zebra | 100323-05 SB | 512 m east of road, road to Leeubron, 6.91 km north-west of Okaukuejo      |  |
| AF 411 | 4 | Burchell's zebra | 100323-03 SB | 4.8 km north-west of Leeubron, 458 m east of Leeubron 2-track              |  |
| AF 415 | 4 | Burchell's zebra | 100324-01 MK | 2.5 km north of Okaukuejo, 1 km east of road to airfield                   |  |
| AF 418 | 4 | Burchell's zebra | 100325-02 MK | 723 m south of Okondeka, 160 m west of road                                |  |
| AF 420 | 4 | Burchell's zebra | 100330-01 SB | 400 m south of Sprokieswoud-Adamax junction                                |  |
| AF 424 | 4 | Burchell's zebra | 100402-01 SB | 1.24 km north of Natco, 180 m east of road                                 |  |
| AF 425 | 4 | Burchell's zebra | 100406-02 SB | 7.45 km east of Adamax, 122 m north of road                                |  |
|        |   |                  |              |                                                                            |  |
| AF 356 | 6 | Burchell's zebra | 100115-01 MK | 2.67 km east of Leeubron, south of Leeubron-Okondeka road                  |  |
| AF 358 | 6 | Springbok        | 100201-02 ZH | where western 2-track meets with Adamax-Okondeka road                      |  |
| AF 364 | 6 | Burchell's zebra | 100203-05 MK | ~4 km north-west of Okaukuejo off of sewer road                            |  |
| AF 366 | 6 | Burchell's zebra | 100203-03 MK | ~400 m north-east of East-West runway                                      |  |

|        |   |                  |              |                                                                                                  |                     |
|--------|---|------------------|--------------|--------------------------------------------------------------------------------------------------|---------------------|
| AF 367 | 6 | Burchell's zebra | 100203-02 MK | 0.75 km north of East-West runway                                                                | continuing outbreak |
| AF 368 | 6 | Burchell's zebra | 000203-01 MK | 3.33 km north-west of Okaukuejo, ~50 m east of East-West runway                                  |                     |
| AF 370 | 6 | Burchell's zebra | 100204-04 SB | north-east of Leeubron on road to Wolfsnes, south side of road                                   |                     |
| AF 373 | 6 | Burchell's zebra | 100205-01 MK | 3.22 km north-east of Okaukuejo, 980 south-east of East-West Runway                              |                     |
| AF 374 | 6 | Springbok        | 100208-01 MK | 600 m north of Airfield, 3.6 km north of Okaukuejo                                               |                     |
| AF 376 | 6 | Springbok        | 100209-01 MK | 2.2 km north of enclosure (eastern 2-track)                                                      |                     |
| AF 377 | 6 | Burchell's zebra | 100209-01 MK | 3.62 km south-east of Leeubron, 600 m west of main road                                          |                     |
| AF 378 | 6 | Blue wildebeest  | 100212-01 SB | 0.76 north-west of Gemsbokvlakte                                                                 |                     |
| AF 379 | 6 | Burchell's zebra | 100215-01 MK | ~4 km east of Sprokieswoud-Adamax junction                                                       |                     |
| AF 380 | 6 | Burchell's zebra | 100218-01 SB | ~5 km west of Adamax on old track                                                                |                     |
| AF 384 | 6 | Burchell's zebra | 100219-02 WT | 5.6 km north-west of Okaukuejo, ~200 m west of road to Leeubron, south of two track to Grunewald |                     |

|        |   |                  |              |                                                                                                             |                   |                        |
|--------|---|------------------|--------------|-------------------------------------------------------------------------------------------------------------|-------------------|------------------------|
| AF 389 | 6 | Burchell's zebra | 100222-01 SB | 880 m east of road, 2.8 km south-west of Wolfsnes                                                           |                   |                        |
| AF 393 | 6 | Springbok        | 100223-01 WT | 1 km north of Wolfsnes turnoff on side of road, 0.5 m off road                                              |                   |                        |
| AF 391 | 6 | Burchell's zebra | 100224-01 WT | 370 m west of Leeubron detour, 630 m south of Leeubron-Sprokieswoud-Adamax road                             |                   |                        |
| AF 399 | 6 | Blue wildebeest  | 100301-01 BK | 1 km from Namutoni towards Causeway                                                                         | separate outbreak |                        |
| AF 400 | 6 | Burchell's zebra | 100307-01 SB | ~300 m south of main road, ~ 1 km east of Gemsbokvlakte turnoff (1st one)                                   |                   |                        |
| AF 403 | 6 | Burchell's zebra | 100317-01 SB | 5.83 km north-north-west of Okaukuejo, 1.27 km west of road to Okondeka, west of first Acacia on road north |                   |                        |
| AF 406 | 6 | Burchell's zebra | 100320-02 SB | 5.04 km north of Okaukuejo, between Leeubron & Okondeka roads                                               |                   |                        |
| AF 414 | 6 | Springbok        | 100323-02 SB | 300 m north-west of Leeuboss                                                                                |                   |                        |
| AF 412 | 6 | Burchell's zebra | 100323-04 SB | 4.45 km south-west of Leeubron, 1.21 km east of SA junction road                                            |                   |                        |
| AF 408 | 6 | Burchell's zebra | 100323-01 MK | 3.2 km north of Okaukuejo, 420 m south of East-West Runway                                                  |                   |                        |
|        |   |                  |              |                                                                                                             |                   | continuing from before |

|        |    |                  |              |                                                                                                                                      |                   |
|--------|----|------------------|--------------|--------------------------------------------------------------------------------------------------------------------------------------|-------------------|
| AF 417 | 6  | Blue wildebeest  | 100324-01MK  | 4.2 km north-north-east of Okaukuejo, 469 m north-north-east of East-West runway, 796 m south-west of North-South runway (North end) | from before       |
| AF 419 | 6  | Burchell's zebra | 100325-03 MK | 890 m south-west of Okondeka, 608 m west of road                                                                                     |                   |
| AF 422 | 6  | Burchell's zebra | 100331-01 SB | 2.4 km west of Leeubron, 750 m north of road                                                                                         |                   |
| AF 421 | 6  | Burchell's zebra | 100331-01 ZH | 81 m east of Eastern-2-track (368 m north of Leeubron-Okondeka road)                                                                 |                   |
| AF 423 | 6  | Springbok        | 100402-01 SB | 5.07 km east of Adamax, 155 m south of road                                                                                          |                   |
| AF 431 | 6  | Springbok        | 100409-01 MK | 2.1 km north of Okaukuejo road to airfield, 300 m east of road                                                                       |                   |
|        |    |                  |              |                                                                                                                                      |                   |
| AF 416 | 8  | Springbok        | 100324-01 MK | 5 km south-west of Leeubron, 560 m west of road                                                                                      | separate outbreak |
|        |    |                  |              |                                                                                                                                      |                   |
| AF 387 | 9  | Springbok        | 100220-01 MK | 6.2 km north-west of Okaukuejo, ~250 m north of Grunewald two track off road to Leeubron                                             | separate outbreak |
|        |    |                  |              |                                                                                                                                      |                   |
| AF 381 | 35 | Burchell's zebra | 100219-01 WT | 3.2 km east-north-east of Leeubron, 520 m south of road Leeubron-Okondeka                                                            | separate outbreak |
|        |    |                  |              |                                                                                                                                      |                   |

|        |    |                  |              |                                                                          |                   |
|--------|----|------------------|--------------|--------------------------------------------------------------------------|-------------------|
| AF 401 | 37 | Burchell's zebra | 100311-02 SB | 2.1 km east of Okaukuejo, ~300 m north of Gemsbokvlakte road             | separate outbreak |
| AF 434 |    | Burchell's zebra | 100221-02 SB | Okondeka road, about 6.7 km north of airfield turnoff, 20 m west of road |                   |
| AF 436 |    | Burchell's zebra | 100221-03 SB | 7.98 km from Okaukuejo, on road to Leeubron, ~30 m west of road          |                   |
| AF 437 |    | Burchell's zebra | 100301-01 ZH | Sprokieswoud, north side of road across from fenced area                 |                   |
| AF 435 |    | Burchell's zebra | 100306-01 SB | 5.2 km north-north-east Natco, 195 m west of road                        |                   |
| AF 438 |    | Burchell's zebra | 100311-01 SB | 1.4 km east of Okaukuejo                                                 |                   |
| AF 439 |    | Burchell's zebra | 100319-01 ZH | ~4 km south of Leeubron, east side of road                               |                   |
| AF 442 |    | Burchell's zebra | 100319-02 ZH | Okaukuejo, ~1 km north of twin trees on west side of road                |                   |
| AF 426 |    | Burchell's zebra | 100408-01 SB | 450 m south of Okaukuejo waterhole, 140 m south of road to water tower   |                   |
| AF 427 |    | Burchell's zebra | 100408-02 SB | 7.09 km south-south-west of Leeubron                                     |                   |
| AF 428 |    | Burchell's zebra | 100408-03 SB | 6.53 km south-south-west of Leeubron                                     |                   |
| AF 429 |    | Burchell's zebra | 100408-04 SB | 8.03 km north-west of Okaukuejo                                          |                   |

|        |  |                  |              |                                                                                     |
|--------|--|------------------|--------------|-------------------------------------------------------------------------------------|
| AF 432 |  | Burchell's zebra | 100409-03 SB | ~2 km west-south-west of Leeubron, ~100 m south of road to Sprokieswoud-Adamax      |
| AF 430 |  | Burchell's zebra | 100409-01 ZH | open plain between Leeubron & Sprokieswoud-Adamax junction, ~2 km west of Leeubron  |
| AF 443 |  | Burchell's zebra | 100411-01 MK | 2 km south-east of Sprokieswoud-Adamax junction, 360 m south off road               |
| AF 433 |  | Burchell's zebra | 100411-02 MK | track to Adamax gravel pit, gravel pit 3 m west of road (350 m north of gravel pit) |
| AF 444 |  | Burchell's zebra | 100412-01 ZH | 800 m east of Sprokieswoud-Adamax junction                                          |
| AF 445 |  | Burchell's zebra | 100413-01 SB | ~500 m north of road, 3.06 km west of Sprokieswoud-Adamax junction                  |
| AF 446 |  | Blue wildebeest  | 100413-01 BK | ~1 km east of Sprokieswoud, ~300 m north of road                                    |
| AF 447 |  | Burchell's zebra | 100413-02 SB | ~100 m north-east of Grunewald gravel pit                                           |
| AF 448 |  | Black rhinoceros | 100413-01 MK | 832 m north-north-east of Homob Toilet camp, in gravel pit                          |
| AF 451 |  | Burchell's zebra | 100414-01 SB | 7 km north of Okaukuejo, ~660 m west of Okondeka road                               |



|        |  |                  |              |                                                                                       |
|--------|--|------------------|--------------|---------------------------------------------------------------------------------------|
| AF 452 |  | Burchell's zebra | 100414-02 SB | 6.21 km N of Leeubron, 245m W of Leeubron 2-track                                     |
| AF 450 |  | Blue wildebeest  | 100414-01 SB | 7.88 km south-east of Leeubron, 400 m south of road                                   |
| AF 449 |  | OM               | 100414-01 SB | 5.5 km north-west of Okaukuejo, 1.65 km east of road to Leeubron                      |
| AF 453 |  | Burchell's zebra | 100414-04SB  | 1 km north-east of Sprokieswoud-Adamax junction, ~800 m east of road to Adamax        |
| AF 454 |  | Springbok        | 100415-02 SB | 1.79 km south of Sprokieswoud-Adamax                                                  |
| AF 455 |  | Burchell's zebra | 100415-01 SB | 3.51 km south-west of Leeubron, 1 km south of Sprokieswoud-Adamax, 641 m west of road |
| AF 456 |  | Burchell's zebra | 100415-02 SB | 1.19 km south-west of Sprokieswoud-Adamax, 872 m south of road                        |
| AF 457 |  | Burchell's zebra | 100415-03 SB | 1.92 km south of Sprokieswoud-Adamax, 1.11 km west of road                            |
| AF 459 |  | Burchell's zebra | 100416-02 SB | ~100 m north of Okondeka-Adamax road, ~9 km west of Okondeka                          |
| AF 458 |  | Burchell's zebra | 100416-01 SB | 1 km west of Adamax gravel pit, ~600 m south of Okondeka-Adamax road                  |

|        |  |                  |              |                                                                                  |
|--------|--|------------------|--------------|----------------------------------------------------------------------------------|
| AF 461 |  | Burchell's zebra | 100421-02 SB | 5.02 km south-west of Natco, 1.69 km south-west of road to Sprokieswoud-Adamax   |
| AF 460 |  | Burchell's zebra | 100421-01 SB | 4.46 km north-west of Okaukuejo                                                  |
| AF 463 |  | Burchell's zebra | 100423-02 ZH | north of Okaukuejo, 2 km from twin trees                                         |
| AF 462 |  | Burchell's zebra | 100423-01 ZH | ~2 km south of Wolfsnes, ~80 m north of two Acacia on the road to Okondeka       |
| AF 464 |  | Blue wildebeest  | 100424-01 ZH | north of Okaukuejo, ~2 km from Okaukuejo and about 800 m north of sewage turnoff |
| AF 465 |  | Burchell's zebra | 100427-01 ZH | 890 m north-west of Okaukuejo, west of road to sewage                            |
| AF 467 |  | Springbok        | 100428-01 MK | 800 m east of Sprokieswoud, 80 m north of road                                   |
| AF 466 |  | Blue wildebeest  | 100428-01 MK | 5.1 km west of Okondeka, ~210 m north of road to Adamax                          |
| AF 468 |  | Burchell's zebra | 100502-01 WB | 8.2 km north-west of Okaukuejo, road to Okondeka, ~20 m west of road             |
| AF 470 |  | Burchell's zebra | 100503-03 MK | 4.6 km south of Okaukuejo, Stark's pan, 130 m east of road                       |

|        |  |                  |              |                                                                                        |
|--------|--|------------------|--------------|----------------------------------------------------------------------------------------|
| AF 469 |  | Burchell's zebra | 100503-01 MK | Okaukuejo-Okondeka-Leeubron junction                                                   |
| AF 472 |  | Springbok        | 100506-01    | ~4 km south of Leeubron and 100 m north of the vulture roosting trees                  |
| AF 471 |  | Springbok        | 100509-01 MK | 410 m east of northern end of North-South-Runway                                       |
| AF 473 |  | Burchell's zebra | 100510-01 MK | 4.5 km west-north-west of Okaukuejo, 800 m north of two track to Grunewald             |
| AF 474 |  | Burchell's zebra | 100525-01 CC | north-east of Gemsbokvlakte, 5 km from Gemsbokvlakte close to the end of transect 34   |
| AF 475 |  | Burchell's zebra | 100531-01 MK | 3.1 km south of Gaseb, west drive, east of road                                        |
| AF 476 |  | Burchell's zebra | 100602-01 MK | 15.4 km south-west of Gemsbokvlakte, south-east loop of west drive, 625 m west of road |
| AF 477 |  | Springbok        | 100603-01 MK | 940 m south of Gaseb, 370 m west of West-Drive-Road                                    |
| AF 478 |  | Burchell's zebra | 100603-01 MK | 3.4 km south of Gemsbokvlakte, 550 m west of West-Drive                                |
| AF 479 |  | Burchell's zebra | 100607-02 MK | 750 m south of Gemsbokvlakte, ~300 m east of road                                      |

|        |  |                  |               |                                                                              |
|--------|--|------------------|---------------|------------------------------------------------------------------------------|
| AF 480 |  | Burchell's zebra | 100607-03 MK  | 1.2 km south of Gembokvlakte, West-Drive, ~50 m west of road in Catophractes |
| AF 481 |  | Burchell's zebra | 100607-04 MK  | 400 m south of Gembokvlakte, road to W-Drive, east of road 34 m              |
| AF 506 |  | Elephant         | 100606-01 OA  | Aus waterhole                                                                |
| AF 505 |  | Springbok        | 100628-01 MK  | 620 m north-east of Newbrowonii, 200 m north of road                         |
| AF 483 |  | Burchell's zebra | 100614-01 MK  | Diamond drive, top intersection, 265 m south of main road to Newbrowonii     |
| AF 496 |  | Burchell's zebra | 100617-01 MK  | 2.3 km north-west of Gembokvlakte                                            |
| AF 484 |  | Burchell's zebra | 100618-01 SB  | 2 km away from Okaukuejo on road to Gembokvlakte                             |
| AF 485 |  | Burchell's zebra | 100621-01 ZH  | W-Drive, east of Gaseb, ~4 km away                                           |
| AF 486 |  | Burchell's zebra | 100622-01 WV  | Halali plains west                                                           |
| AF 487 |  | Burchell's zebra | 1000625-01 SB | W-Drive ~1 km from Gembokvlakte, 50 m north of road                          |
| AF 488 |  | Burchell's zebra | 100628-01 ZH  | Gembokvlakte 200 m from waterhole                                            |
| AF 489 |  | Burchell's zebra | 100706-01 MK  | 1.7 km north-east of W-Drive gravel pit, 1 km east of W-Drive-Road           |
| AF 490 |  | Burchell's zebra | 100707-01 MK  | 1.6 km south of Gembokvlakte, 700 m east of road                             |

|        |  |                  |              |                                                                                     |
|--------|--|------------------|--------------|-------------------------------------------------------------------------------------|
| AF 491 |  | Burchell's zebra | 100707-02 MK | 1.2 km south of Gembokvlakte, ~80 m west of road, down W-Drive                      |
| AF 494 |  | Burchell's zebra | 100707-03 MK | 990 m north of Gembokvlakte, road to main road, 220 m north of road                 |
| AF 492 |  | Springbok        | 100708-01 WV | 2.8 km south of Gembokvlakte, 180 m east of road                                    |
| AF 493 |  | Burchell's zebra | 100714-01 SB | 3.37 km south of Gonob, 50 m east of track                                          |
| AF 495 |  | Burchell's zebra | 100719-01 MK | ~2.8 km east of Gaseb turn-off, road to Gembokvlakte, ~400 m north of road          |
| AF 497 |  | Springbok        | 100723-01 MK | 650 m south-east of Okaukuejo, south of location, 230 m east of road                |
| AF 498 |  | Elephant         | 100726-01 ZH | 700-800 m south of Okaukuejo, west of tar road                                      |
| AF 499 |  | Springbok        | 100801-01 RZ | 1.1 km north-north-west of Okaukuejo, ~250 m north-east of gravel pit by big Acacia |
| AF 500 |  | Springbok        | 100811-01 MK | two-track to Grunewald                                                              |
| AF 501 |  | LA               | 100828-01 MK | Okaukuejo waterhole                                                                 |
| AF 502 |  | Burchell's zebra | 100830-02 ZH | ~4 km south-east of Gembokvlakte, W-Drive                                           |
| AF 503 |  | Burchell's zebra | 100906-01 ZH | ~150 m north of Okaukuejo waterhole                                                 |

|                  |  |                  |                 |                                                                |
|------------------|--|------------------|-----------------|----------------------------------------------------------------|
| AF 504           |  | Elephant         | 100908-01<br>WK | 700 m along eastern detour to Ombika, southern intersection    |
| not yet analyzed |  | Burchell's zebra | 100916-01<br>WV | on powerline corner south of location??? ~700 m                |
|                  |  | Burchell's zebra | 100922-01<br>WV | open plain between Okaukuejo and airfield                      |
|                  |  | Gemsbok          | 100927-01<br>MK | 3.16 km south of Okaukuejo, 650 m east of tar road             |
|                  |  | Blue wildebeest  | 100929-01<br>ZH | 10 km south of Leeubron, south of road                         |
|                  |  | Springbok        | 100930-01<br>ZH | ~4 km south of Leeubron, west of road                          |
|                  |  | Elephant         | 100930-01<br>ZH | 100-150 m north of Duiwelsvuur                                 |
|                  |  | Elephant         | 100930-02<br>ZH | 200 m east of Duiwelsvuur waterhole                            |
|                  |  | Black rhinoceros | 101012-01<br>BK | Nerens                                                         |
|                  |  | Burchell's zebra | 101012-01<br>MK | 840 m south-south-west of Okaukuejo, south of 2-track          |
|                  |  | Elephant         | 101012-01<br>MK | 4.64 km south-east of M'Bari, ~15m south of road               |
|                  |  | Giraffe          | 101013-01<br>MK | ~600 m north of Okondeka waterhole                             |
|                  |  | Burchell's zebra | 101019-01<br>CC | 3.85 km north-east of Gemsbokvlakte, road to Nebrownii         |
|                  |  | Burchell's zebra | 101019-01<br>MK | 4.5 km north-north-east of Okaukuejo, east of East-West runway |

|  |                  |                 |                                                               |
|--|------------------|-----------------|---------------------------------------------------------------|
|  | Burchell's zebra | 101019-02<br>MK | 4.3 km north-north-east of Okaukuejo, edge of pan             |
|  | Burchell's zebra | 101019-04<br>MK | just east of Gemsbokvlakte                                    |
|  | Burchell's zebra | 101019-05<br>MK | ~6 km north of Okaukuejo, road to Okondeka, 50 m west of road |
|  | Burchell's zebra | 101021-01<br>ZH | just east of Gemsbokvlakte                                    |
|  | Springbok        | 101025-01<br>MK | 580 m south-south-west of Gemsbokvlakte, W-drive              |
|  | Burchell's zebra | 101112-01<br>ZH | 4.9 km north-east?? of Okaukuejo, Leeubron road               |
|  | Black rhinoceros | 101114-01<br>CC | 1.5 km south of Gemsbokvlakte, W-drive                        |
