# Supplementary material for: Distribution and Molecular Evolution of Bacillus anthracis Genotypes in Namibia
Source: PLoS Negl Trop Dis. 2012 Mar 6;6(3):e1534. doi: 10.1371/journal.pntd.0001534 (PMC3295808; doi:10.1371/journal.pntd.0001534)
Supplement: Table S4 — Diversity indices and allele numbers of MLVA markers with respect to the collection investigated. (XLS) [file pntd.0001534.s010.xls]

## Sheet: Tabelle1
marker	# alleles	DI
bams 1	5	7.2
bams 13	11	12.3
bams 15	3	7.2
bams 21	2	1.6
bams 22	4	6.2
bams 23	3	3.7
bams 24	1	0
bams 25	1	0
bams 28	2	0.5
bams 3	3	2.1
bams 30	8	7.8
bams 31	4	22.7
bams 34	2	6.7
bams 44	2	1.6
bams 5	4	7.2
bams 51	2	0.5
bams 53	2	0.5
CG 3	2	1.6
pX01	4	13.6
pX02	8	59.5
VNTR 12	3	1.1
VNTR 16	3	2.1
VNTR 17	2	3.1
VNTR 19-2	2	3.6
VNTR 23	3	3.1
VNTR 35	2	0.5
vrr A	4	2.6
vrr B1	3	6.2
vrr B2	2	0.5
vrr C1	3	1.1
vrr C2	2	1.6
mean	3.29032	6.06452
